# Supplementary material for: Dramatic reduction in the activation barrier for dinitrogen splitting using amine–borane as a hydrogen carrier: insights from the DFT study
Source: Royal Society of Chemistry journal article supplement (doi:10.1039/c3cc48285e), 2013-12-19
Supplement: c3cc48285e.pdf [file c3cc48285e.pdf]

## Electronic Supporting Information

### Dramatic Reduction in Activation Barrier for Dinitrogen Splitting Using Amine-Borane as Hydrogen Carrier: Insights from DFT Study

Tanmay Malakar, Ankan Paul\*

#### *Contents:*

**S1. Computational Details.**

**S2. Cluster model of the silica supported tantalum monohydride species.**

**S3. Schematic representation of proposed experimental strategy.**

**S4. N<sub>2</sub> splitting by the trihydride species [(≡Si-O)<sub>2</sub>TaH<sub>3</sub>](1') in presence of N<sub>2</sub> and <sup>i</sup>Pr<sub>2</sub>NHBH<sub>3</sub> (A) as hydrogen carrier.**

**S5. Table containing relative free energies of some important transition state computed by single point calculation on the B3LYP optimized geometries at different DFT functional using extra basis functions on Ta and Si atoms.**

**S6. Discussion on the effect of reduction of barrier on N<sub>2</sub> bond cleavage reaction kinetics.**

**S7. Possibility of NH<sub>3</sub> formation from intermediate 10.**

**S8. Possibility of dehydrogenation of (<sup>i</sup>Pr<sub>2</sub>NHBH<sub>3</sub>) (A) by species [(≡Si-O)<sub>2</sub>TaH] (1).**

**S9. Possibility of dehydrogenation of intermediate 9.**

**S10. Thermodynamics of dehydrogenation of (<sup>i</sup>Pr<sub>2</sub>NHBH<sub>3</sub>) (A).**

**S11. Optimized geometries of some important intermediates.**

**S12. Table of gas phase total energies, thermal enthalpy corrections(H<sub>Corr</sub>) and free energy corrections (G<sub>Corr</sub>) of all species.**

**S13. The optimized geometries of the structures reported in the paper (the atomic symbol followed by the three Cartesian coordinates, in Å).**

**S14. References**

## S1. Computational Details:

Gas phase geometry optimization of all intermediates and transition states were done using the B3LYP hybrid functional. The effective core potential LANL2DZ along with LANL2DZ basis set was applied for tantalum and silicon atoms. For all other atoms Pople's 6-311++G(d,p) basis functions were employed. This basis set combination is called B1. Harmonic frequency analyses were performed at the same level of theory to characterize the nature of the stationary points as true intermediate or transition state. Furthermore, intrinsic reaction coordinate (IRC) analysis was carried out to confirm that all stationary points are connected to each other and constructs a smooth potential energy surface (PES). Following this single point calculations were executed at the same level of theory employing additional set of 6p functions and a set of f functions on Ta atom and a set of d functions on Si atoms in **gas phase**.<sup>1</sup> This basis set combination is called B2. To check the sensitivity of the predicted barriers on basis sets we have further optimized some crucial intermediates and transition states using B3LYP with basis set B2 with a set of additional p functions on all Si atoms<sup>2</sup> and the computed barriers showed variation less than 0.5 kcalmol<sup>-1</sup>. The standard Gibbs free energies ( $G^\circ$ ) of all species were obtained by adding the free energy corrections ( $G_{\text{Corr}}$ ) obtained from the frequency computations at B3LYP/B1 to the single point gas phase energies obtained at B3LYP/B2 on optimized geometries obtained at B3LYP/B1. The text in the manuscript discusses the stability in terms relative **gas phase** Gibbs free energy difference ( $\Delta G$ ) at 298 K and 1 atm pressure until and unless mentioned otherwise. All computations were done using Gaussian 09 suite of quantum chemistry programs.<sup>3</sup>

The reason behind choosing the B3LYP functional for computation for the present system is that the B3LYP functional was already used for describing the same silica supported tantalum surface in earlier theoretical reports.<sup>4</sup> Furthermore, B3LYP functional is routinely used for system containing tantalum metal.<sup>5</sup> To check whether B3LYP functional produces correct chemical trends or not, further single point computations using M06L,<sup>6</sup> TPSSH, and B3PW91 functional were performed employing the basis set B2 on optimized geometries obtained from B3LYP/B1. The results are provided in Table 1.

S2.

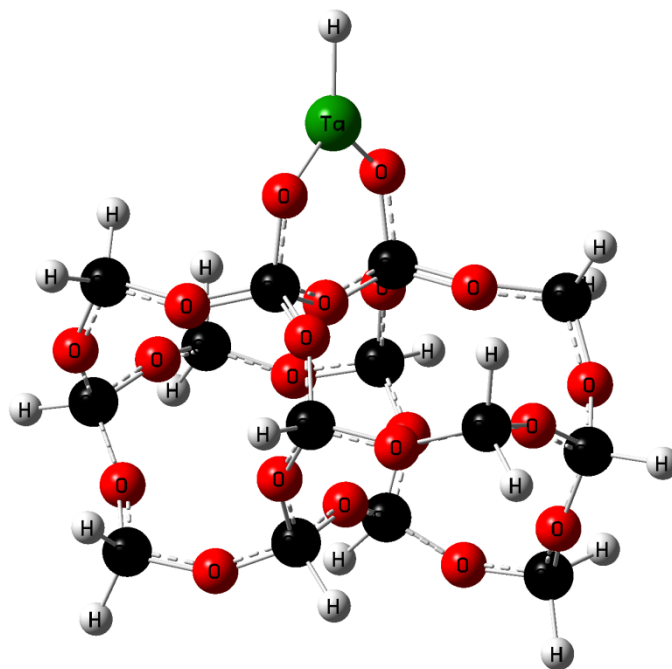

**Fig 1:** Cluster model system of the silica supported mono tantalum hydride species (**1**) used for computation. Si atoms are represented by black balls.

**S3. Schematic representation of proposed experimental strategy.**

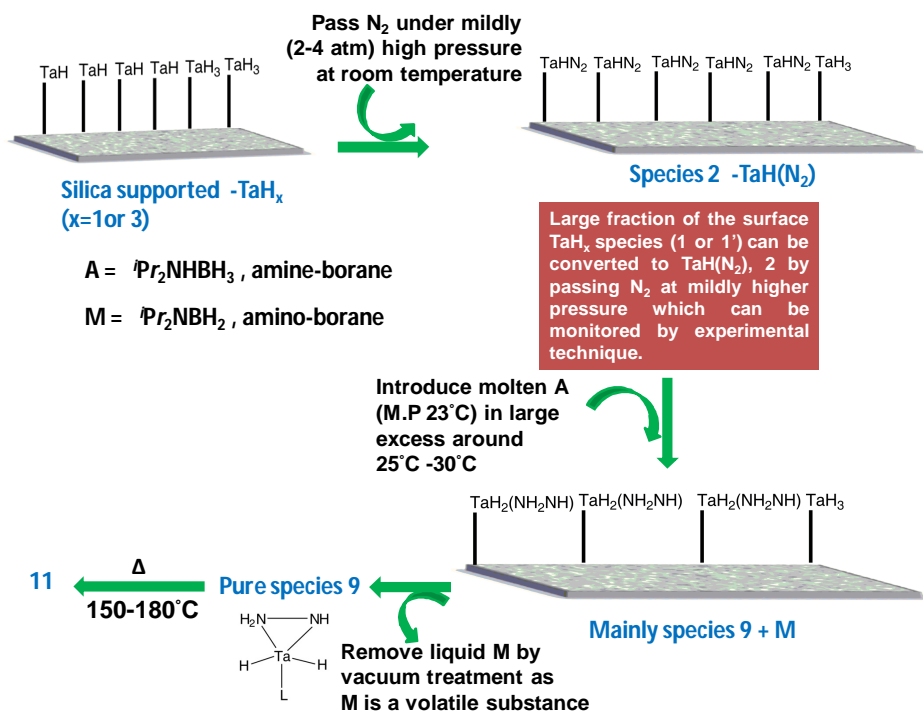

**S4. N<sub>2</sub> splitting by the trihydride species [(≡Si-O)<sub>2</sub>TaH<sub>3</sub>](**1'**) in presence of N<sub>2</sub> and <sup>i</sup>Pr<sub>2</sub>NHBH<sub>3</sub> (**A**) as hydrogen carrier.**

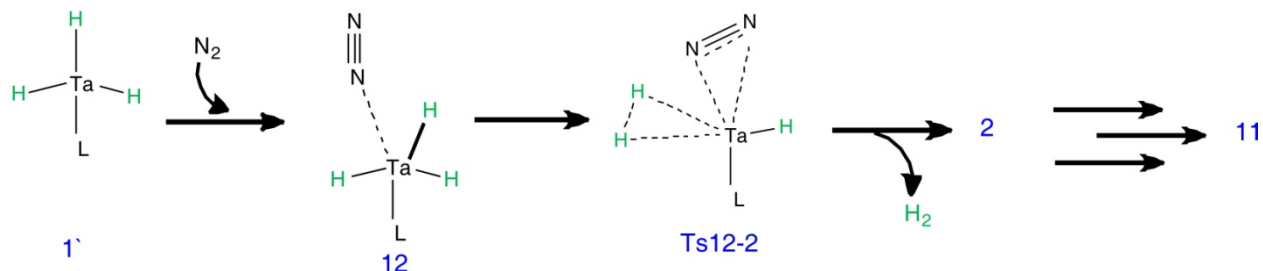

**Scheme 1:** Formation of intermediate **11** from Tantalum trihydride species.

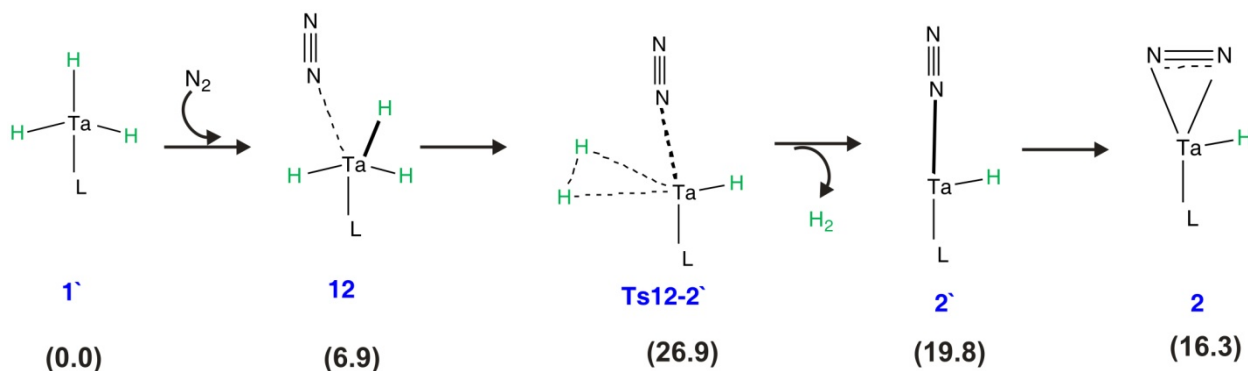

**Scheme 2:** Alternative low barrier channel of formation of **2** from **1'** and N<sub>2</sub>. The relative Gibbs free energy values (in kcalmol<sup>-1</sup>) are given in parenthesis.

Since the manufacturing process of silica supported tantalum hydrides having general formula [(≡Si-O)<sub>2</sub>TaH<sub>x</sub>] from the precursor yielded the mono hydride (i.e. x=1) as the major product,<sup>7</sup> we consider the silica supported tantalum monohydride [(≡Si-O)<sub>2</sub>TaH](**1**) as the most abundant reactive species and the generation of final tantalum amido imido product, [(≡Si-O)<sub>2</sub>Ta(=NH)(NH<sub>2</sub>)] (**11**) by using (<sup>i</sup>Pr<sub>2</sub>NHBH<sub>3</sub>) (**A**) as a hydrogen carrier instead of direct molecular H<sub>2</sub> has been discussed in the main manuscript. As the trihydride species [(≡Si-O)<sub>2</sub>TaH<sub>3</sub>](**1'**) is another possible reactive species which may be present in the reaction system, we conducted computation for the transformation of **1'** into **11** in presence of N<sub>2</sub> and **A**. We found **1'** is free energetically 27.1 kcalmol<sup>-1</sup> stable compared to isolated **1** and H<sub>2</sub>. **1'** can convert to **2** by displacement of H<sub>2</sub> by N<sub>2</sub>. We found two different routes for this process (see **Scheme 1** and **Scheme 2** above). One operates at an overall free energy activation barrier of 35.8 kcal/mol and the other at only 26.9 kcal/mol. Formation of **2** from isolated **1'** and N<sub>2</sub> is endoergic by 16.3 kcalmol<sup>-1</sup>. The route shown in Scheme 1 is in excellent agreement with the previous theoretical study.<sup>4</sup> However, route shown in Scheme 2 is in satisfactory agreement (but not Scheme 1) with the experimental findings of Basset et al.<sup>8</sup> The mechanistic route for transformation of **2** into **11** in presence of **A** has been described in details in the manuscript.

The free energy profile for the overall reaction represented by the equation:  $1' + N_2 + 2A = 11 + 2M + 2H_2$  is given below.

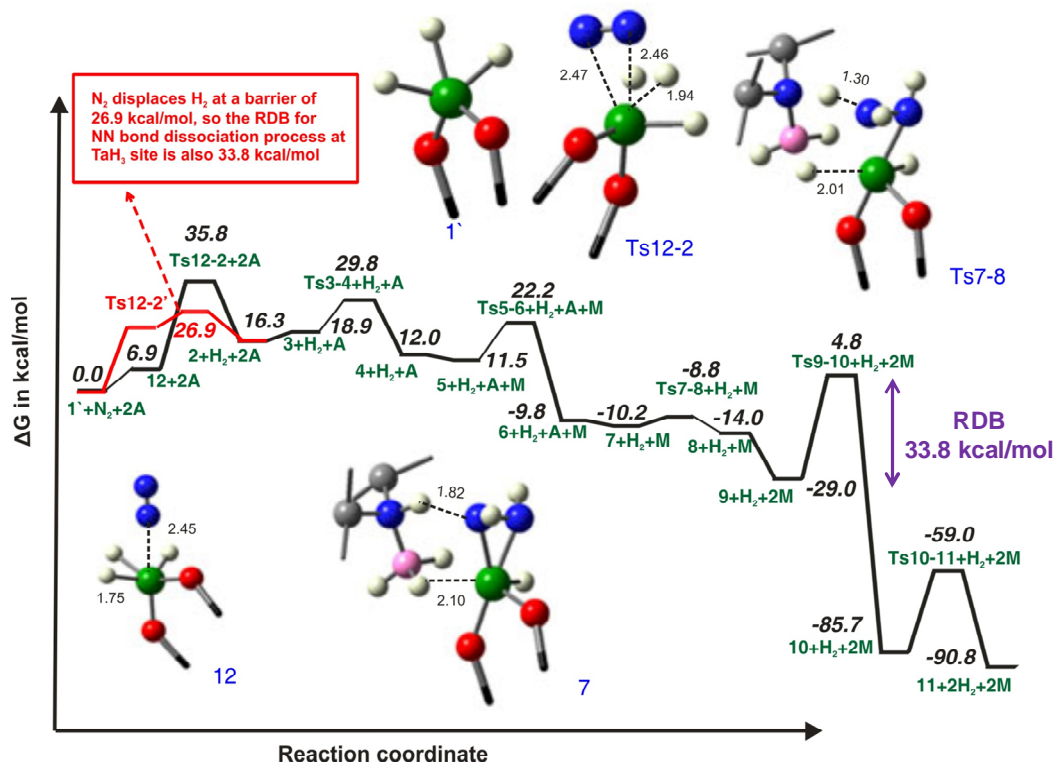

**Fig 2:** Gibbs free energy profile for  $N_2$  cleavage by the Ta trihydride species linked to silica surface using  $iPr_2NHBH_3$  as hydrogen carrier. All bond lengths in the optimized geometries are in Å. Color code: Ta green, N blue, O red, Si black, H white, C grey, B pink. Isopropyl groups are represented by grey balls and sticks to maintain clarity. The rest of the substituents on Ta centre are omitted for clarity. All geometries are optimized at B3LYP/B1.

The free energy profile shown in **Fig. 2**, predicts that **Ts12-2'** (shown in scheme 2), i. e. binding of  $N_2$  to **1'** leading to formation of **2** along with  $H_2$  removal happens at a free energy barrier of 26.9 kcal/mol. So it turns out that the  $N_2$  bond scission corresponding to **TS9-10** would determine the RDB of the process and as our computations indicate that the RDB would be  $33.8 \text{ kcal mol}^{-1}$ , which is exactly similar to the case of Ta-H case. Though we expect that the surface would be majorly populated by species **2** which can react rapidly with **A** to produce **9** at room temperature, we feel at moderately elevated temperatures of  $120^\circ\text{C}$  even the  $TaH_3$  sites would react with amine-boranes at a reasonable rate ( $2.3 \times 10^{-4} \text{ s}^{-1}$ ; Please see S6 for approximate rate determination). The transformation of **1'** to **9** (95 % completion) can happen in less than 7 hours. If the temperature is further raised this would accelerate and  $140^\circ\text{C}$  the rate is expected to be  $1.54 \times 10^{-3} \text{ s}^{-1}$ . Note that **A** starts decomposing only at  $250^\circ\text{C}$ .<sup>13</sup>

**S5. Table containing free energies of activation of some important transition state computed by single point calculation on the B3LYP optimized geometries at different DFT functional using extra basis functions on Ta and Si atoms.**

| <b>Species</b> | <b>B3LYP</b> | <b>M06L</b> | <b>TPSSH</b> | <b>B3PW91</b> |
|----------------|--------------|-------------|--------------|---------------|
| <b>Ts1-2</b>   | <b>14.5</b>  | <b>7.7</b>  | <b>11.1</b>  | <b>14.0</b>   |
| <b>Ts3-4</b>   | <b>13.5</b>  | <b>13.1</b> | <b>5.8</b>   | <b>9.0</b>    |
| <b>Ts5-6</b>   | <b>10.8</b>  | <b>20.6</b> | <b>14.1</b>  | <b>12.4</b>   |
| <b>Ts7-8</b>   | <b>1.4</b>   | <b>2.4</b>  | <b>0.7</b>   | <b>0.1</b>    |
| <b>Ts9-10</b>  | <b>33.8</b>  | <b>32.4</b> | <b>28.7</b>  | <b>35.6</b>   |
| <b>Ts10-11</b> | <b>26.7</b>  | <b>27.0</b> | <b>22.6</b>  | <b>24.0</b>   |

**Table 1:** Gibbs free energies of activation of some important transition states at different DFT functional. All values are in kcalmol<sup>-1</sup>.

All functional suggest that formation of **9** and other preceding intermediates can happen at room temperature as all the predicted barriers are about 20 kcalmol<sup>-1</sup> or in general less than that 20 kcalmol<sup>-1</sup>. All of them barring B3PW91 predicts a lower rate determining barrier (corresponding to **Ts9-10**) than B3LYP. We find B3PW91 predicts a barrier which is just 1.8 kcalmol<sup>-1</sup> higher than the barrier estimated at the B3LYP level of theory. TPSSH tends to predict a barrier 5.1 kcalmol<sup>-1</sup> lower compared to the barrier predicted by B3LYP. So in general we see that the general chemical findings remain the same and is independent of the functional that we use.

## S6. Discussion on the effect of reduction of barrier on N<sub>2</sub> bond cleavage reaction kinetics.

Quadrelli et al. reported that they experimentally observed 95% completion of reaction (i.e. formation of **11** from N<sub>2</sub> splitting by silica supported tantalum hydride (**1**) species in presence of molecular H<sub>2</sub>) in 3days at 250°C (523K).<sup>8</sup> If we assume that the reaction follow a first order/pseudo first order reaction kinetics which obeys the rate equation given by,

$$kt = \ln(c_0/c) \dots\dots(1)$$

where, k=rate constant in s<sup>-1</sup>, t=time in seconds (s), c=concentration of reactant at any instant time=t, c<sub>0</sub>= initial concentration of reactant. From the experimental observation<sup>7</sup> using equation 1, the rate constant of the reaction is estimated to be k=1.15×10<sup>-5</sup> s<sup>-1</sup>.

For simplicity we assume that the rate (k) of a reaction follows Eyring equation:

$$k = (k_B T/h) \exp(-(\Delta G^\ddagger/RT)) \dots\dots\dots(2)$$

Where, k<sub>B</sub>=Boltzmann's constant = 1.38×10<sup>-23</sup> J/K

h= Planck's constant = 6.63×10<sup>-34</sup>J s

T= Temperature in K

R= Universal molar gas constant = 1.99×10<sup>-3</sup> kcalmol<sup>-1</sup>K<sup>-1</sup>

ΔG<sup>‡</sup> = Free energy of activation in kcalmol<sup>-1</sup>

If we now put the value of k=1.15×10<sup>-5</sup> s<sup>-1</sup> in equation 2, we get the ΔG<sup>‡</sup> to be equal to 42.9 kcalmol<sup>-1</sup>, which is nearly equal to the ΔG<sup>‡</sup> predicted by Li et.al.<sup>3</sup> This finding suggests that the assumptions made by us regarding the reaction kinetics are satisfactory and may be used to check the effect of suppression of barriers on reaction temperatures.

Now according to equation 2, a reaction having ΔG<sup>‡</sup>=23.0 kcalmol<sup>-1</sup> at 298K and 1atm, the rate constant (k<sub>298K</sub>) is predicted to be 8.9×10<sup>-5</sup> s<sup>-1</sup> and the half life of the reaction is estimated to be of 130 min and for 97% completion of the reaction the time required would be 10.8 hours.<sup>10</sup>

For simplicity, we are assuming that Eyring equation (equation 2) is also valid in the amine-borane facilitated NN bond dissociation case. We calculated the rate constant for the RDS i.e for **TS9-10** step using the above equation 2. We found that for N-N bond splitting at an isolated Ta centre on silica surface using amine-borane (A) as a hydrogen carrier, with an associated ΔG<sub>298K, Our</sub><sup>‡</sup>=33.8 kcalmol<sup>-1</sup> (at 298K, 1atm) the rate constant would be k<sub>298K, Our</sub> = 1.1×10<sup>-12</sup> s<sup>-1</sup>. However, if the reaction temperature is raised to 160°C (433K) then a significant rate enhancement can be observed. We calculated the rate constant at 160°C (433K) and 1atm, and it is predicted to be of k<sub>433K, Our</sub> = 8.3×10<sup>-5</sup> s<sup>-1</sup>. So we can expect that reaction would complete (95 % completion) in a reasonable time frame (less than 12 hours) if the reaction temperature is raised to 160°C (433K). Generally, the default calculations of free energy of activation (ΔG<sup>‡</sup>) is done at 298K and 1 atm. So, we recalculated the free energy of activation (ΔG<sup>‡</sup>) at 433K and 1atm. We found that the ΔG<sup>‡</sup> remains almost unchanged at 433K and 1atm (ΔG<sub>433K, our</sub><sup>‡</sup>=33.85 kcalmol<sup>-1</sup>). Hence, following our strategy the N-N bond scission can be achieved at a much faster rate (k<sub>433K, Our</sub> = 8.3×10<sup>-5</sup> sec<sup>-1</sup>) in less than 12 hours at 433K, which can be a significant development. We also calculated the rate constant for the corresponding RDB for N-N bond cleavage by direct H<sub>2</sub> predicted by Li et.al.<sup>3</sup> by following the above equation 2. They predicted a ΔG<sub>523K, Li et al.</sub><sup>‡</sup>=43.0 kcalmol<sup>-1</sup> at 250°C (523K). The rate constant (k<sub>523K, Li. et al.</sub>) is estimated to be 1.24×10<sup>-5</sup> s<sup>-1</sup>. For comparison, we also calculated the rate constant at 250°C (523K) for the ΔG<sub>523K, Our</sub><sup>‡</sup>(33.8 kcalmol<sup>-1</sup>) predicted by us. We found that k<sub>523K, Our</sub> = 8.57×10<sup>-2</sup> s<sup>-1</sup>. So, k<sub>523K, Our</sub>/k<sub>523K, Li. et al.</sub> = 6.9×10<sup>3</sup>. These suggest that a



significant amount of rate enhancement would be observed and the NN bon dissociation can be achieved in minutes if we use amine-borane as hydrogen carrier instead of direct dihydrogen for N-N bond splitting at the silica supported tantalum hydride centre.

### S7. Possibility of NH<sub>3</sub> formation from intermediate 10.

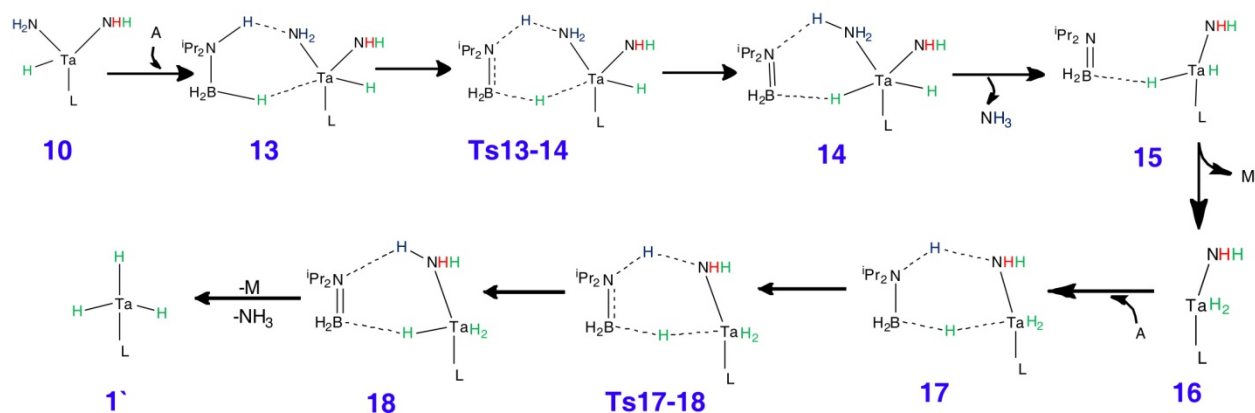

**Scheme 3:** Formation of NH<sub>3</sub> from intermediate **10** in presence of excess <sup>i</sup>Pr<sub>2</sub>NHBH<sub>3</sub>(**A**).

Association of another **A** with **10** can possibly form **13**. From **13**, the proton and hydride of **A** gets transferred to the (NH<sub>2</sub>)(NH<sub>2</sub>)-TaH moiety and produces **14**, a [(≡Si-O)<sub>2</sub>TaH<sub>2</sub>(NH<sub>3</sub>)(NH<sub>2</sub>)] species weakly complexed to **M**. The Gibbs free energy barrier for conversion of intermediate **13** into **14** is predicted to be 24.1 kcalmol<sup>-1</sup>. Dissociation of NH<sub>3</sub> from **14** generates **15**, a [(≡Si-O)<sub>2</sub>TaH<sub>2</sub>(NH<sub>2</sub>)] entity feebly linked to **M**. NH<sub>3</sub> removal from **14** is free energetically 7.3 kcalmol<sup>-1</sup> downhill. Dissociation of **M** from **15** forms [(≡Si-O)<sub>2</sub>TaH<sub>2</sub>(NH<sub>2</sub>)] (**16**). Then again, association of another **A** with **16** can possibly produce **17**. From **17**, the proton and hydride of **A** gets transferred to the (NH<sub>2</sub>)-TaH<sub>2</sub> moiety and produces **18**, a [(≡Si-O)<sub>2</sub>TaH<sub>3</sub>(NH<sub>3</sub>)] species weakly complexed to both **M** and NH<sub>3</sub>. The Gibbs free energy barrier for conversion of intermediate **17** into **18** is predicted to be 20.3 kcalmol<sup>-1</sup>. Subsequent dissociation of NH<sub>3</sub> and **M** from **18** produces the trihydride species [(≡Si-O)<sub>2</sub>TaH<sub>3</sub>] (**1'**). The free energy profile for the overall reaction for formation of NH<sub>3</sub> represented by the equation: **1**+N<sub>2</sub>+4**A** = **1'**+4**M**+2NH<sub>3</sub> is given below.

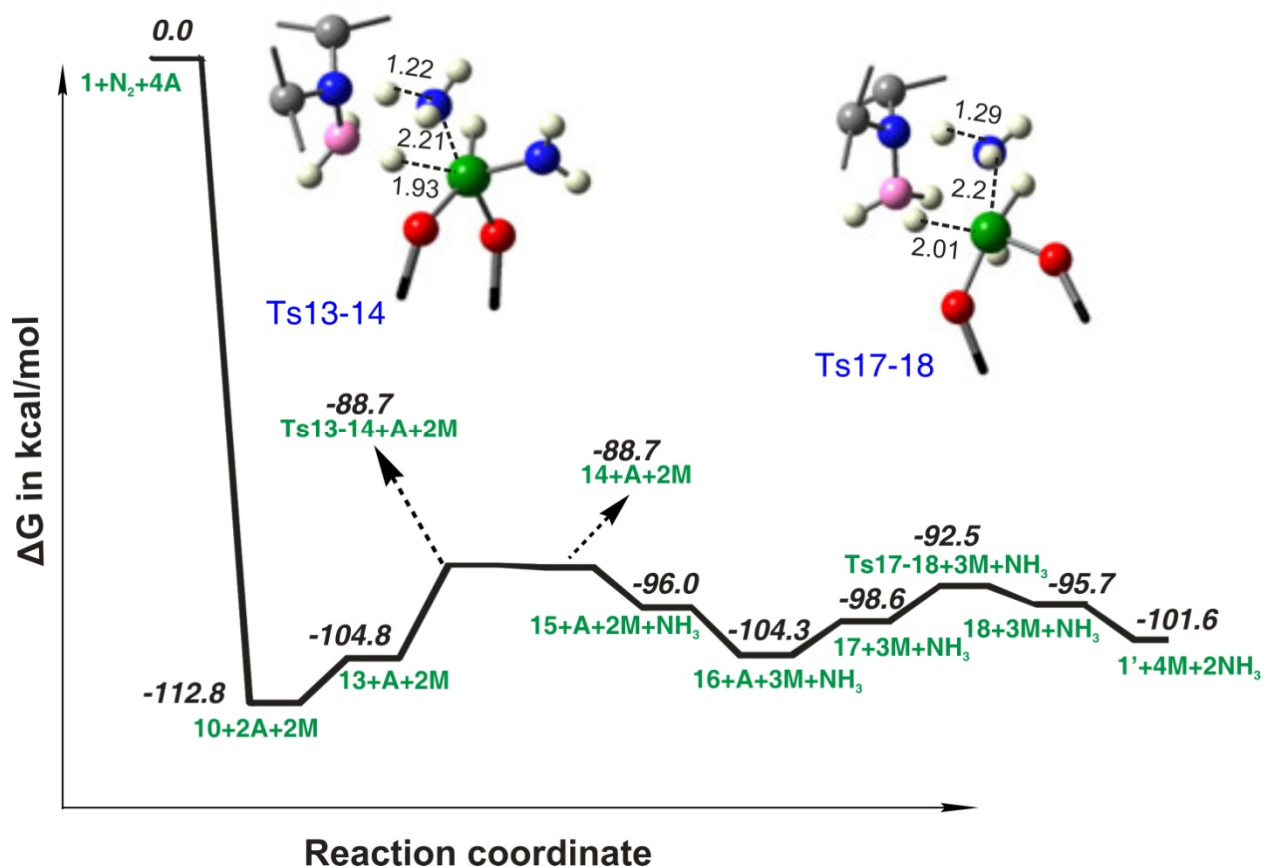

**Fig 3.** Gibbs free energy profile for possible NH<sub>3</sub> formation at the Ta centre linked to silica surface using <sup>1</sup>Pr<sub>2</sub>NHBH<sub>3</sub> as hydrogen carrier. All bond lengths in the optimized geometries are in Å. Color code: Ta green, N blue, O red, Si black, H white, C grey, B pink. Isopropyl groups are represented by grey balls and sticks to maintain clarity. The rest of the substituents on Ta centre are omitted for clarity

Intermediate **11** is very similar to **10**, except it has two less number of hydrogen atom. **11** is 5.1 kcalmol<sup>-1</sup> stable compared to **10**. We believe that in presence of excess **A**, **11** is another possible species from which NH<sub>3</sub> can be formed. In that case the RDS for ammonia formation from **11** and **A** would be associated with a ΔG<sup>‡</sup> of 29.2 kcalmol<sup>-1</sup>.

Although it is known that the surface species **1** consume NH<sub>3</sub>,<sup>11</sup> there is still possibility of small amount of NH<sub>3</sub> formation following our strategy if proper reaction monitoring can be achieved. These can be done in the possible following ways:

- (i) If one can devise a strategy to remove the ammonia (if it is produced) immediately after its generation from the reaction vessel.
- (ii) If we can introduce an inert species in to the reaction system, which can trap ammonia and then the trapped ammonia can be released.
- (iii) By proper designing of the surface keeping the main active site unchanged, which would not consume ammonia.

### S8. Possibility of dehydrogenation of (<sup>i</sup>Pr<sub>2</sub>NHBH<sub>3</sub>) (A) by species [(≡Si-O)<sub>2</sub>TaH], 1.

According to the reaction strategy which we mentioned in manuscript and also in S3 the possibility of dehydrogenation of A by free 1 species is significantly low. On exposing the surface to N<sub>2</sub> at mildly elevated pressures at room temperature a very large fraction of 1 is likely to get transformed to 2. Species 2 would react with amine-borane at very low barriers to form 9, a significantly stable entity. At room temperature conversion of 2 to 9 is practically irreversible as the barrier for 9 reverting to 2 is more than 58 kcal/mol. If our proposed strategy is adopted then bare Ta-H sites (species 1) would be minimized before A is introduced in the system. As the number of Ta-H species (1) would be minimized largely due to the conversion of those sites to 2, the small remaining fraction of the sites which are Ta-H sites would either compete in binding N<sub>2</sub> leading to formation of 9 or dehydrogenate amine-borane (as both the rate determining barriers are more or less similar with the former being 14.5 kcal/mol and the later being 13.3 kcal/mol). So we expect only a small amount of loss of amine-borane (A) to wasteful would occur due to dehydrogenation of A converting Ta-H (1) species to TaH<sub>3</sub> (1'). Additionally TaH<sub>3</sub> (1') can effectuate N<sub>2</sub> dissociation like the Ta-H (1) site on reacting with amine-borane at an overall barrier of 33.8 kcal/mol (which is exactly similar to that in the case of the Ta-H site).

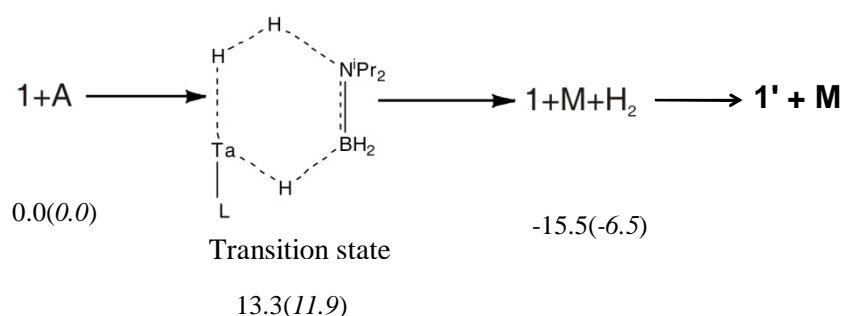

**Scheme 4:** Dehydrogenation of <sup>i</sup>Pr<sub>2</sub>NHBH<sub>3</sub>(A) by 1. The relative Gibbs free energy and enthalpy (in parenthesis) of reactants, transition state, and product are given in kcalmol<sup>-1</sup>.

### S9. Possibility of dehydrogenation of 9.

9 can dehydrogenate in three possible ways. These are discussed below.

i) 9 can dehydrogenate to intermediate 6. The free energy activation barrier is estimated to be 33.3 kcal/mol, but the recombination of H<sub>2</sub> to 6 to revert back to 9 is favorable by a barrier of 30 kcal/mol. Hence the reverse reaction is significantly faster. Note that this dehydrogenation leads to a slightly higher energy product. However almost at a similar competitive barrier the NN bond dissociation occurs (with a RDB of 33.8 kcal/mol) producing a hugely thermodynamically favorable product with stabilization gain of 56 kcal/mol (free energy change). Conversion of 9 to 10 would occur irreversibly, as the back reaction from 10 to 9 would happen at an insurmountable barrier over 89 kcal/mol. Note for the original experiment of Basset et al. where only 0.5 Torr H<sub>2</sub> pressure is used to achieve NN bond dissociation, Eisentstein et al. predicts that the RDB for NN bond dissociation in the experiment by Basset et al. is over 47 kcal/mol. This suggests that even at a low dehydrogenation barrier for conversion of 9 to 6 compared to the RDB of 47 kcal/mol, a significant yield of 10 is obtained, suggesting this is thermodynamically controlled reaction and recombination of H<sub>2</sub> to 6 to revert back to 9 is fast. This would hold true in our case also, as it would be carried out in a closed system. Thermodynamic control would inevitably determine the fate of the reaction. 9 would initially lose some H<sub>2</sub> and almost at equal rate 10 would be formed from 9. As partial pressure of H<sub>2</sub> would

increase in the system recombination of H<sub>2</sub> to **6** to form **9** would become substantial and gradually all of **9** would irreversibly convert to **10**.

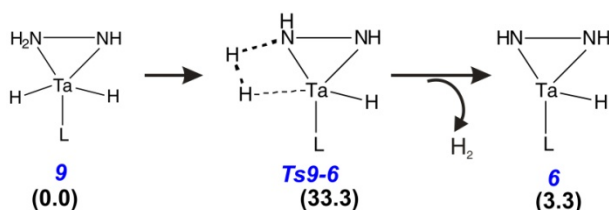

**Scheme 5** : Dehydrogenation of **9** to form **6**. The relative Gibbs free energy values (in kcalmol<sup>-1</sup>) are given in parenthesis.

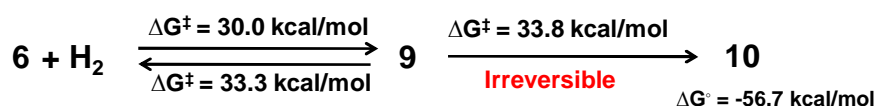

ii) Dehydrogenation of **9** may lead to the formation of an intermediate where the bisprotonated nitrogen, and the other nitrogen making a double bond with the Ta centre. This possibility also has been explored. The Gibbs free energy barrier for this dehydrogenation pathway is estimated to be 43.1 kcal/mol.

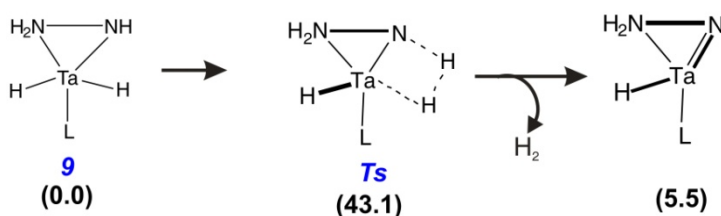

**Scheme 6** : Possible dehydrogenation pathway of **9**. The relative Gibbs free energy values (in kcalmol<sup>-1</sup>) are given in parenthesis.

iii) The other way of dehydrogenation of intermediate **9** would lead to the formation of the intermediate [(≡Si-O)<sub>2</sub>Ta(NH<sub>2</sub>NH)]. The Gibbs free energy barrier for this dehydrogenation pathway is predicted to be 37.5 kcal/mol.

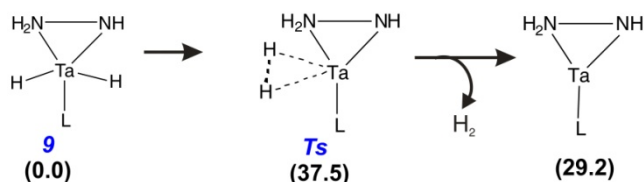

**Scheme 7** : Possible dehydrogenation pathway of **9**. The relative Gibbs free energy values (in kcalmol<sup>-1</sup>) are given in parenthesis.

All the dehydrogenation reactions of **9** are endoergic and are associated with reasonably high Gibbs free energy barrier of activation or similar to the RDB of NN bond dissociation. On the other hand, the NN bond dissociation step (**Ts9-10**) from **9** is highly exothermic and for all practical purposes is irreversible. So, it is the thermodynamic stability of the product generated from **9**, which turns out to be the deciding factor of the fate of **9** (**THERMODYNAMIC CONTROL OF REACTION**).

### S10. Thermodynamics of dehydrogenation of (<sup>i</sup>Pr<sub>2</sub>NHBH<sub>3</sub>) (**A**).

The dehydrogenation of **A** can be represented by the equation: <sup>i</sup>Pr<sub>2</sub>NHBH<sub>3</sub> → <sup>i</sup>Pr<sub>2</sub>N=BH<sub>2</sub> + H<sub>2</sub>

The calculated solvent phase enthalpy change (ΔH<sub>s</sub>) for the above reaction in three different solvents at B3LYP, M06L, M062X, M06 and M052X functional is given below.

|                                        | ΔH <sub>s</sub> in kcal/mol |
|----------------------------------------|-----------------------------|
| B3LYP/CPCM/THF/6-311++g(d,p)           | -2.3                        |
| B3LYP/CPCM/Toluene/6-311++g(d,p)       | -4.0                        |
| B3LYP/CPCM/Acetonitrile/6-311++g(d,p)  | -1.6                        |
| M06L/CPCM/THF/6-311++g(d,p)            | 4.9                         |
| M06L/CPCM/Toluene /6-311++g(d,p)       | 3.2                         |
| M06L/CPCM/Acetonitrile /6-311++g(d,p)  | 5.6                         |
| M062X/ CPCM/THF/6-311++g(d,p)          | 1.6                         |
| M062X/CPCM/Toluene /6-311++g(d,p)      | -0.1                        |
| M062X/CPCM/Acetonitrile /6-311++g(d,p) | 2.3                         |
| M06/CPCM/THF/6-311++g(d,p)             | 1.3                         |
| M06/CPCM/Toluene /6-311++g(d,p)        | -0.4                        |
| M06/CPCM/Acetonitrile /6-311++g(d,p)   | 2.0                         |
| M052X/ CPCM/THF/6-311++g(d,p)          | 1.1                         |
| M052X/CPCM/Toluene /6-311++g(d,p)      | -0.6                        |
| M052X/CPCM/Acetonitrile /6-311++g(d,p) | 1.8                         |

Solvent phase single point calculation were done using CPCM<sup>12</sup> model on the respective B3LYP and M06L gas phase optimized geometries. For obtaining CPCM enthalpies, (H(s)) thermal corrections for

enthalpies ( $H_{\text{corr}}$ ) were added to the corresponding solution phase total energies ( $E(s)$ ), which is a fairly standard practice.

The calculated reaction enthalpies (which are consistent in various level of theory) strongly suggest that the reverse reaction i.e. the amino-borane (**M**) can possibly rehydrogenated back into the parent amine-borane (**A**) by proper choice of solvent (preferably acetonitrile) and maintaining other necessary reaction condition. Furthermore, amine-borane (hydrogen carrier) with a general formula  $R_2HNBHR'_2$  can be designed by proper choice of R and R' such that the amino-borane ( $R_2N=BR'_2$ ) will remain in monomeric and also the rehydrogenation to the parent amine-borane might possibly become more thermodynamically feasible.

### S11. Optimized geometries of some important intermediates.

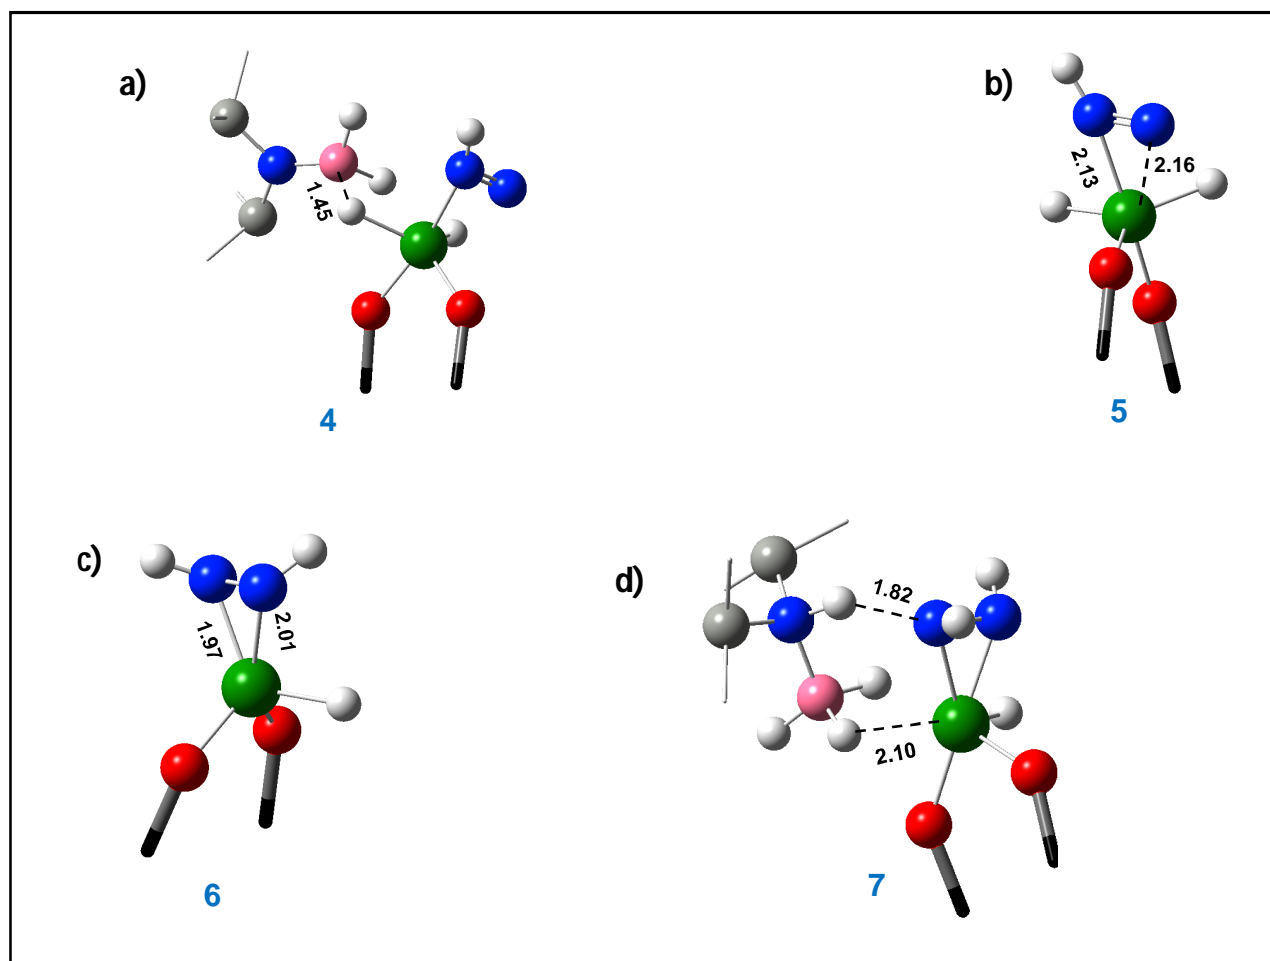

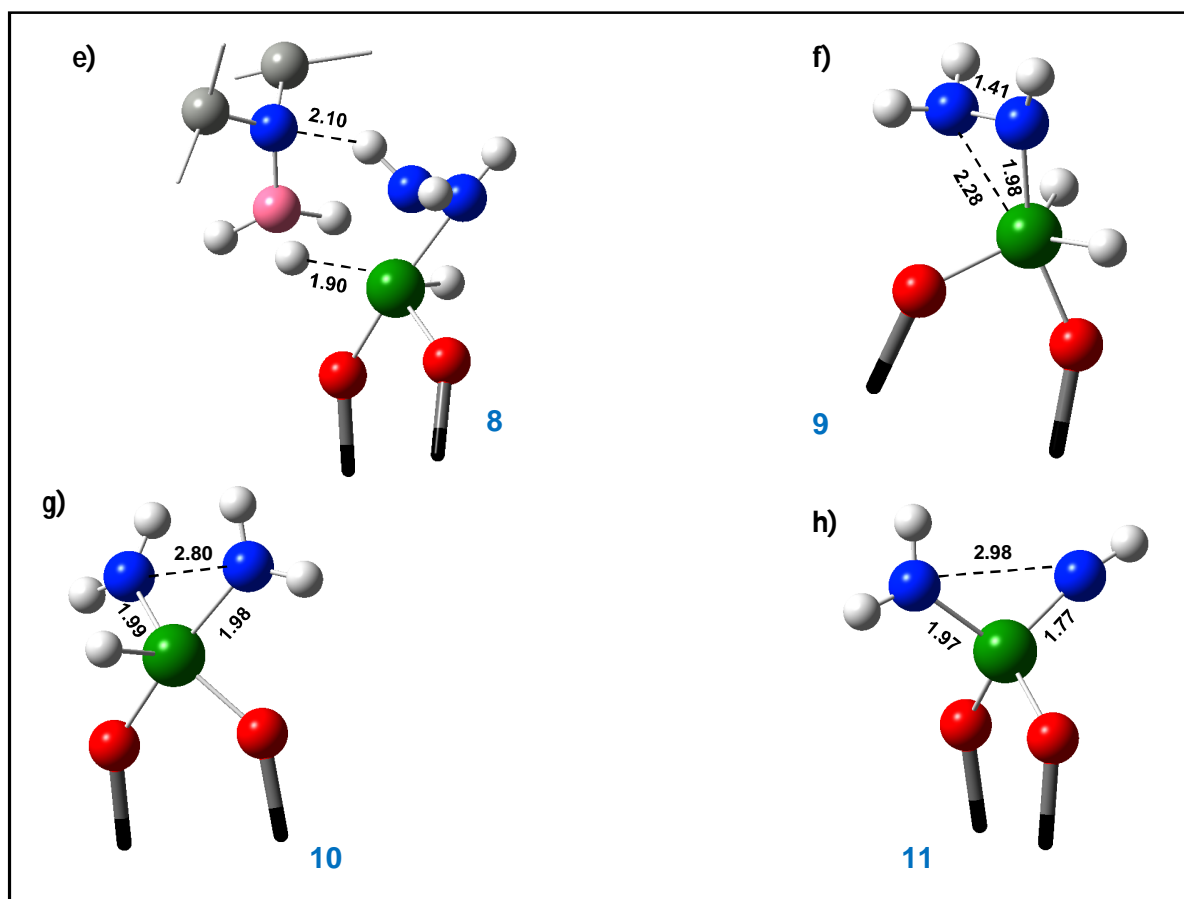

**Fig 4:** Optimized Geometries of species a) 4, b) 5, c) 6, d) 7, e) 8, f) 9, g) 10, h) 11 optimized at B3LYP/B1 level of theory. All bond lengths in the optimized geometries are in Å. Color code: Ta green, N blue, O red, Si black, H white, C grey, B pink. Isopropyl groups are represented by grey balls and sticks to maintain clarity. The rest of the substituents on Ta centre are omitted for clarity



**S12. Table of gas phase total energies, thermal corrections to enthalpy ( $H_{\text{Corr}}$ ) and free energy ( $G_{\text{Corr}}$ ) of all species.**

| Species        | Total Energy in Hartree | $H_{\text{Corr}}$ in Hartree | $G_{\text{Corr}}$ in Hartree |
|----------------|-------------------------|------------------------------|------------------------------|
| 1              | -1629.926036            | 0.316279                     | 0.180882                     |
| N <sub>2</sub> | -109.5596937            | 0.008875                     | -0.012863                    |
| Ts1-2          | -1739.479544            | 0.325754                     | 0.184345                     |
| 2              | -1739.51884             | 0.326924                     | 0.185943                     |
| A              | -319.1797174            | 0.250981                     | 0.203799                     |
| M              | -318.0019302            | 0.228406                     | 0.181684                     |
| 3              | -2058.719894            | 0.580976                     | 0.414079                     |
| Ts3-4          | -2058.699184            | 0.573377                     | 0.412873                     |
| 4              | -2058.727668            | 0.578408                     | 0.411496                     |
| 5              | -1740.702098            | 0.346943                     | 0.207362                     |
| Ts5-6          | -1740.681393            | 0.344842                     | 0.205894                     |
| 6              | -1740.737766            | 0.350563                     | 0.21127                      |
| 7              | -2059.945322            | 0.604619                     | 0.440105                     |
| Ts7-8          | -2059.938925            | 0.599267                     | 0.436165                     |
| 8              | -2059.949687            | 0.603458                     | 0.438413                     |
| 9              | -1741.94641             | 0.3722                       | 0.232053                     |
| Ts9-10         | -1741.882462            | 0.365106                     | 0.225006                     |
| 10             | -1742.03395             | 0.372902                     | 0.230314                     |
| Ts10-11        | -1741.983215            | 0.36744                      | 0.225979                     |
| 11             | -1740.840052            | 0.352986                     | 0.2118                       |
| H <sub>2</sub> | -1.179571533            | 0.01337                      | -0.001426                    |
| 1'             | -1631.165932            | 0.332248                     | 0.19664                      |
| 12             | -1740.731149            | 0.342964                     | 0.200014                     |
| Ts12-2         | -1740.687043            | 0.342736                     | 0.202129                     |
| 13             | -2061.226104            | 0.626113                     | 0.457546                     |
| Ts13-14        | -2061.196702            | 0.618028                     | 0.453074                     |
| 14             | -2061.200388            | 0.624099                     | 0.45606                      |
| 15             | -2004.615634            | 0.586272                     | 0.426145                     |
| 16             | -1686.594267            | 0.352216                     | 0.213119                     |
| 17             | -2005.790445            | 0.607334                     | 0.441862                     |
| Ts17-18        | -2005.780125            | 0.601798                     | 0.440117                     |
| 18             | -2005.787545            | 0.606126                     | 0.441967                     |

**Table 2:** Gas phase total energies, thermal enthalpy corrections ( $H_{\text{Corr}}$ ) and free energy corrections ( $G_{\text{Corr}}$ ) of all species at their respective optimized geometries at B3LYP/B1. Thermal corrections to enthalpy and free energy are obtained from frequency analysis done at the same level of theory.

**S13. B3LYP/B1 optimized geometries of the structures reported in the paper (the atomic symbol followed by the three Cartesian coordinates, in Å).**

**1**

|    |             |             |             |
|----|-------------|-------------|-------------|
| Si | -5.40157700 | 0.64549300  | -1.27384400 |
| Si | -1.87980700 | 2.53415700  | 1.65213800  |
| Si | -0.75823800 | 0.08945400  | 3.40047500  |
| Si | -4.50007400 | -2.09852500 | 0.09823800  |
| Si | -2.15765100 | -3.23522900 | -1.75195000 |
| Si | 1.57037400  | -0.60371500 | 1.44409000  |
| Si | -2.51843100 | 2.09817200  | -1.43575600 |
| Si | -0.35311000 | 0.77561400  | -3.37538100 |
| Si | 0.24064600  | 4.94357100  | 1.65221400  |
| Si | 2.69620000  | 4.03263800  | -0.22708700 |
| Si | 0.52298200  | -1.47078600 | -1.38599100 |
| Si | 3.88761700  | 1.60933900  | 1.47928100  |
| Si | 2.12716200  | 2.82575900  | -3.17890300 |
| Si | -3.08523800 | -2.13670300 | 3.05673600  |
| O  | -4.12863300 | 1.71377700  | -1.46864900 |
| O  | -0.95027000 | 1.53392500  | 2.60415200  |
| O  | -1.94255200 | 1.90755800  | 0.11330000  |
| O  | -5.03813900 | -0.54523200 | -0.14184200 |
| O  | -0.85377200 | -2.33177800 | -1.19925200 |
| O  | 2.58407800  | -1.97033700 | 1.38406500  |
| O  | 0.83727100  | -0.53162100 | -0.05123500 |
| O  | 0.47771200  | -0.53432700 | -2.73582300 |
| O  | 3.47761000  | 3.13866900  | 0.93861000  |
| O  | 2.48088100  | 0.72040200  | 1.75070200  |
| O  | -1.16042000 | 4.02880300  | 1.60998900  |
| O  | 1.23506100  | 4.56424800  | 0.35126300  |
| O  | 1.82075400  | -2.57067800 | -1.48150800 |
| O  | -1.69599300 | 1.04648900  | -2.43654300 |
| O  | -3.58918500 | -2.55129500 | -1.22217400 |
| O  | 0.43973800  | -0.78622000 | 2.61945800  |
| O  | 2.47542600  | 3.06234400  | -1.55892900 |
| O  | 0.61768400  | 2.11832800  | -3.36808100 |
| O  | -2.17660400 | -0.76290100 | 3.36674500  |
| O  | -3.55640200 | -2.20024900 | 1.45482300  |
| H  | -5.64096400 | -2.98860300 | 0.22952600  |
| H  | -0.35654800 | 0.33453900  | 4.76961100  |
| H  | -0.74763000 | 0.44483200  | -4.72812800 |
| H  | 3.52489600  | 5.17535000  | -0.56847400 |
| H  | -6.52956200 | 1.40589400  | -0.74881800 |
| H  | -5.69568800 | 0.01683800  | -2.56171700 |
| H  | -2.37198100 | 3.46684000  | -1.89268600 |
| H  | -0.16670500 | 6.33679500  | 1.51356400  |
| H  | -3.21274300 | 2.68507600  | 2.20321000  |
| H  | 0.96090600  | 4.68439000  | 2.89935800  |
| H  | 4.56292000  | 1.77477600  | 2.75957400  |
| H  | -2.17871600 | -3.20362200 | -3.21162800 |
| H  | 3.14566000  | 1.93385800  | -3.72643400 |
| H  | 2.07344100  | 4.11598600  | -3.86304700 |
| H  | -2.27369600 | -3.32054500 | 3.32684700  |
| H  | -4.27099400 | -2.05444500 | 3.90613500  |
| H  | -2.02114100 | -4.58557100 | -1.21373900 |
| H  | 4.70567700  | 0.92365700  | 0.48046300  |
| Ta | 2.95949700  | -3.08568500 | -0.08007300 |
| H  | 4.14364100  | -4.41963700 | -0.12048300 |

## Ts1-2

|    |             |             |             |
|----|-------------|-------------|-------------|
| Si | -5.00708300 | -2.51936300 | -1.46613300 |
| Si | -3.18907100 | 0.82544200  | 1.58069700  |
| Si | -0.81342900 | -0.22514500 | 3.48929400  |
| Si | -2.76778200 | -4.08558500 | 0.19100400  |
| Si | -0.12326900 | -3.69738300 | -1.65070700 |
| Si | 1.48244400  | 0.59699200  | 1.54835100  |
| Si | -3.32705200 | 0.22933400  | -1.52614800 |
| Si | -0.74109300 | 0.37002500  | -3.38378100 |
| Si | -3.10063200 | 4.03001600  | 1.48229900  |
| Si | -0.53988800 | 4.82742900  | -0.31027600 |
| Si | 1.20568600  | -0.80882200 | -1.23129200 |
| Si | 1.90667700  | 3.77416400  | 1.44136000  |
| Si | -0.05426600 | 3.51863900  | -3.23713100 |
| Si | -1.34023800 | -3.37317800 | 3.05513300  |
| O  | -4.49199800 | -0.93843400 | -1.67432800 |
| O  | -1.85558500 | 0.67952500  | 2.56420700  |
| O  | -2.80571800 | 0.28334300  | 0.05464000  |
| O  | -4.15514800 | -3.28438600 | -0.23476600 |
| O  | 0.59292800  | -2.31355300 | -1.01657000 |
| O  | 3.10774900  | 0.10687500  | 1.50840000  |
| O  | 0.85971500  | 0.17819400  | 0.05858800  |
| O  | 0.67164400  | -0.13105100 | -2.62980000 |
| O  | 0.59654200  | 4.66100200  | 0.89438000  |
| O  | 1.40507500  | 2.20878500  | 1.81317000  |
| O  | -3.60068600 | 2.43304900  | 1.49539300  |
| O  | -2.01651200 | 4.29450600  | 0.22411400  |
| O  | 2.90068200  | -0.94053100 | -1.25895400 |
| O  | -2.02475800 | -0.18447100 | -2.48655000 |
| O  | -1.66372400 | -3.88543500 | -1.04084000 |
| O  | 0.68567600  | -0.20401300 | 2.73774300  |
| O  | -0.03791500 | 3.92537900  | -1.61349000 |
| O  | -0.78007500 | 2.02366900  | -3.46567200 |
| O  | -1.33689000 | -1.79085400 | 3.60416300  |
| O  | -2.16622000 | -3.46953500 | 1.60345700  |
| H  | -3.05583400 | -5.50014800 | 0.35837800  |
| H  | -0.70925100 | 0.34244700  | 4.81564800  |
| H  | -0.77815100 | -0.20143100 | -4.71259100 |
| H  | -0.63197900 | 6.23071400  | -0.67376800 |
| H  | -6.40436000 | -2.47580900 | -1.05305000 |
| H  | -4.81305700 | -3.24843600 | -2.71949400 |
| H  | -3.89578000 | 1.49489700  | -1.94705000 |
| H  | -4.28826600 | 4.83841300  | 1.23182700  |
| H  | -4.31649100 | 0.09403900  | 2.12399000  |
| H  | -2.45130900 | 4.35646500  | 2.75237500  |
| H  | 2.35934400  | 4.39728200  | 2.67758300  |
| H  | -0.23496600 | -3.55377900 | -3.10008000 |
| H  | 1.33091700  | 3.45410300  | -3.69436800 |
| H  | -0.85450000 | 4.48984500  | -3.97981100 |
| H  | 0.03652500  | -3.82009400 | 2.84901800  |
| H  | -2.04563600 | -4.16354200 | 4.05914400  |
| H  | 0.70637000  | -4.83131300 | -1.25380700 |
| H  | 2.94074100  | 3.71483400  | 0.40963800  |

2

|    |             |             |             |
|----|-------------|-------------|-------------|
| Si | -5.17606600 | -2.20221000 | -1.37947600 |
| Si | -3.07023000 | 0.96893600  | 1.69370600  |
| Si | -0.69884800 | -0.33200700 | 3.43801700  |
| Si | -2.96438500 | -3.95622000 | 0.11966300  |
| Si | -0.36531000 | -3.66487900 | -1.78337700 |
| Si | 1.58615100  | 0.38785000  | 1.44715500  |
| Si | -3.39402000 | 0.48191400  | -1.41751500 |
| Si | -0.89043600 | 0.56995800  | -3.38362100 |
| Si | -2.79666100 | 4.16780700  | 1.69768200  |
| Si | -0.20942100 | 4.84160200  | -0.10460000 |
| Si | 1.10507900  | -0.83910200 | -1.41443900 |
| Si | 2.19422400  | 3.53757100  | 1.55155000  |
| Si | 0.04604800  | 3.64668600  | -3.10189100 |
| Si | -1.51690400 | -3.41877800 | 3.02094600  |
| O  | -4.61454700 | -0.63079800 | -1.53164800 |
| O  | -1.70767900 | 0.69368000  | 2.60801900  |
| O  | -2.78191700 | 0.46961400  | 0.13170000  |
| O  | -4.31090200 | -3.04738100 | -0.21082500 |
| O  | 0.41897600  | -2.30728900 | -1.16450100 |
| O  | 3.17455000  | -0.21219300 | 1.35197000  |
| O  | 0.94413100  | 0.13154200  | -0.07325700 |
| O  | 0.51778400  | -0.08559400 | -2.74606100 |
| O  | 0.92902300  | 4.51684700  | 1.06461900  |
| O  | 1.62037200  | 1.97610500  | 1.82876600  |
| O  | -3.38172900 | 2.59985400  | 1.69251300  |
| O  | -1.71460800 | 4.39388100  | 0.42990700  |
| O  | 2.78157800  | -1.09058000 | -1.57209500 |
| O  | -2.16450500 | 0.04151800  | -2.45917700 |
| O  | -1.90592900 | -3.78051200 | -1.15604800 |
| O  | 0.73807800  | -0.44729000 | 2.57547700  |
| O  | 0.19710200  | 3.98196200  | -1.46857400 |
| O  | -0.81027300 | 2.22294600  | -3.33848200 |
| O  | -1.36578800 | -1.84051800 | 3.56239300  |
| O  | -2.24801300 | -3.43722000 | 1.51715900  |
| H  | -3.34077900 | -5.35346800 | 0.25222700  |
| H  | -0.44446200 | 0.19447700  | 4.76124400  |
| H  | -1.02887700 | 0.10132300  | -4.74530600 |
| H  | -0.19615200 | 6.26662500  | -0.38509800 |
| H  | -6.55721600 | -2.13016400 | -0.91950500 |
| H  | -5.04408400 | -2.88056600 | -2.66873600 |
| H  | -3.92976300 | 1.78180100  | -1.77184700 |
| H  | -3.94130500 | 5.04327700  | 1.47482700  |
| H  | -4.21850200 | 0.28552000  | 2.25571000  |
| H  | -2.11557900 | 4.43682400  | 2.96451900  |
| H  | 2.67800600  | 4.05746400  | 2.82275500  |
| H  | -0.48630400 | -3.52285600 | -3.23164500 |
| H  | 1.39120300  | 3.49218200  | -3.64817600 |
| H  | -0.71750300 | 4.70773600  | -3.75452200 |
| H  | -0.18948300 | -4.02015800 | 2.90673300  |
| H  | -2.37021500 | -4.11071400 | 3.98182200  |
| H  | 0.42245100  | -4.82808000 | -1.38558200 |
| H  | 3.22357200  | 3.48878200  | 0.51429100  |
| Ta | 4.05218100  | -0.92133300 | -0.17456100 |
| N  | 5.13359600  | -2.66818700 | 0.23824000  |
| N  | 5.94958600  | -1.90444500 | -0.20217800 |
| H  | 5.05876900  | 0.41939800  | -0.64118900 |

3

|    |             |             |             |
|----|-------------|-------------|-------------|
| Si | 3.78938200  | 4.67373100  | -1.28277600 |
| Si | 3.56351800  | 1.12893800  | 1.91424600  |
| Si | 0.71952500  | 0.71350800  | 3.39608000  |
| Si | 0.83079600  | 4.76020900  | -0.11945400 |
| Si | -0.76164900 | 2.95372500  | -2.29734900 |
| Si | -0.36963300 | -1.34432100 | 1.32197200  |
| Si | 3.89206800  | 1.45684700  | -1.21059600 |
| Si | 2.15914200  | -0.16053600 | -3.32890600 |
| Si | 5.30077700  | -1.52405000 | 2.33215300  |
| Si | 4.02203100  | -3.71187500 | 0.34147900  |
| Si | -0.50146200 | -0.17483800 | -1.65174800 |
| Si | 1.14534300  | -4.14057800 | 1.62968700  |
| Si | 3.31972200  | -3.11681400 | -2.77572100 |
| Si | -0.42181900 | 3.62840100  | 2.67424200  |
| O  | 4.26085200  | 3.06755300  | -1.34933300 |
| O  | 2.23462000  | 0.56365300  | 2.73281700  |
| O  | 3.21760900  | 1.17806900  | 0.28598500  |
| O  | 2.48112100  | 4.88537400  | -0.24527300 |
| O  | -0.84433200 | 1.42907200  | -1.60409300 |
| O  | -1.92699600 | -1.98025400 | 1.13305200  |
| O  | 0.03375900  | -0.73118100 | -0.17890300 |
| O  | 0.60280400  | -0.51221300 | -2.82243900 |
| O  | 2.80069100  | -4.18067100 | 1.37024400  |
| O  | 0.65758300  | -2.53486800 | 1.78424900  |
| O  | 4.82217100  | 0.07158400  | 2.16444600  |
| O  | 4.84249200  | -2.42252400 | 0.98638800  |
| O  | -1.94413700 | -1.01123900 | -1.94466800 |
| O  | 2.75591100  | 1.05836300  | -2.36714100 |
| O  | 0.29247900  | 3.94002700  | -1.46430800 |
| O  | -0.35475500 | -0.14667100 | 2.44322100  |
| O  | 3.33374900  | -3.29159700 | -1.11178500 |
| O  | 3.11732000  | -1.50485400 | -3.19237200 |
| O  | 0.25227900  | 2.30140500  | 3.44013800  |
| O  | 0.42131500  | 3.94215400  | 1.25859700  |
| H  | 0.24412300  | 6.09073900  | -0.09276100 |
| H  | 0.72551700  | 0.19090700  | 4.74507200  |
| H  | 2.10995600  | 0.27942200  | -4.70681400 |
| H  | 4.93747900  | -4.82543600 | 0.16224600  |
| H  | 4.89979400  | 5.43588900  | -0.72508200 |
| H  | 3.42196300  | 5.11761900  | -2.62756200 |
| H  | 5.11295100  | 0.69872000  | -1.40126200 |
| H  | 6.75781200  | -1.51817900 | 2.39464100  |
| H  | 3.96477200  | 2.43340600  | 2.40270800  |
| H  | 4.68616000  | -2.10252600 | 3.52749100  |
| H  | 0.90128900  | -4.81207700 | 2.90005200  |
| H  | -0.26175500 | 2.83500200  | -3.66516700 |
| H  | 2.20328100  | -3.89487800 | -3.30508200 |
| H  | 4.60943600  | -3.53067200 | -3.32486500 |
| H  | -1.81890100 | 3.35591100  | 2.34857000  |
| H  | -0.26862000 | 4.75949400  | 3.58641700  |
| H  | -2.10597900 | 3.52192300  | -2.23937400 |
| H  | 0.44374200  | -4.75865800 | 0.50677300  |
| Ta | -2.81700500 | -1.98547100 | -0.55333600 |
| N  | -4.91226600 | -2.05540500 | -0.60892100 |
| N  | -4.55636200 | -3.16583600 | -0.91359000 |
| H  | -2.01399800 | -3.46248800 | -1.02878200 |
| N  | -5.54899300 | 0.71664200  | 0.34396600  |
| B  | -3.96967100 | 0.82064200  | 0.75965500  |
| H  | -3.81686600 | 0.38085000  | 1.86148700  |
| H  | -3.61229800 | 1.96373800  | 0.63690000  |
| H  | -3.33814700 | 0.13403100  | -0.04656600 |
| H  | -5.67383900 | -0.22986600 | -0.03279200 |
| C  | -6.48930400 | 0.79378900  | 1.53838200  |
| H  | -7.49999100 | 0.80125700  | 1.12783500  |

|   |             |             |             |
|---|-------------|-------------|-------------|
| C | -5.90826600 | 1.66734000  | -0.78674900 |
| H | -5.66038300 | 2.66356600  | -0.41589000 |
| C | -6.37214100 | -0.46825200 | 2.39565100  |
| H | -5.40844900 | -0.53227900 | 2.89928300  |
| H | -7.15960900 | -0.45348600 | 3.15365700  |
| H | -6.50899400 | -1.37003400 | 1.79260900  |
| C | -6.27899500 | 2.07341000  | 2.34487000  |
| H | -6.41247100 | 2.97160500  | 1.73723500  |
| H | -7.01328400 | 2.11036200  | 3.15360400  |
| H | -5.28096000 | 2.10192900  | 2.78391000  |
| C | -7.39099800 | 1.61529300  | -1.17470300 |
| H | -8.05512900 | 2.01155400  | -0.40549700 |
| H | -7.54015400 | 2.22242600  | -2.07042700 |
| H | -7.70525200 | 0.59434700  | -1.41437200 |
| C | -5.03507100 | 1.37100600  | -2.00908900 |
| H | -5.27238800 | 2.08795400  | -2.79858400 |
| H | -3.97462900 | 1.44970600  | -1.78114600 |
| H | -5.23510400 | 0.36870600  | -2.40048000 |

### Ts3-4

|    |             |             |             |
|----|-------------|-------------|-------------|
| Si | 5.08911600  | 3.81909600  | -1.09123200 |
| Si | 4.21944700  | -0.04159200 | 1.86647400  |
| Si | 1.47568100  | 0.59683200  | 3.39065100  |
| Si | 2.22599500  | 4.72206500  | -0.01578000 |
| Si | 0.12368500  | 3.43961600  | -2.08463400 |
| Si | -0.38056900 | -0.82874800 | 1.32585700  |
| Si | 4.46246000  | 0.65474900  | -1.23728000 |
| Si | 2.24216300  | -0.33499100 | -3.29623700 |
| Si | 4.82234700  | -3.19050200 | 1.99680800  |
| Si | 2.70378200  | -4.63400100 | 0.04424300  |
| Si | -0.23146100 | 0.30954500  | -1.50119400 |
| Si | -0.05786900 | -4.00191200 | 1.52364300  |
| Si | 2.36372800  | -3.53866500 | -2.98225700 |
| Si | 1.19323700  | 3.77912900  | 2.94419700  |
| O  | 5.15327300  | 2.16010600  | -1.29497200 |
| O  | 2.79937000  | -0.15598500 | 2.72394700  |
| O  | 3.88148900  | 0.38461600  | 0.29586500  |
| O  | 3.82537600  | 4.27401500  | -0.07591200 |
| O  | -0.24194700 | 1.95290300  | -1.39577600 |
| O  | -2.00649400 | -0.71354000 | 1.03751800  |
| O  | 0.35059100  | -0.40359300 | -0.12349800 |
| O  | 0.64893800  | -0.18693800 | -2.80195400 |
| O  | 1.44651700  | -4.62796100 | 1.13095800  |
| O  | 0.06679200  | -2.34720900 | 1.77942900  |
| O  | 4.96229300  | -1.52641400 | 1.88755000  |
| O  | 4.00145000  | -3.80856100 | 0.66732300  |
| O  | -1.83492000 | -0.18100100 | -1.63775100 |
| O  | 3.18466700  | 0.61557900  | -2.31059500 |
| O  | 1.47135100  | 4.12686300  | -1.37543300 |
| O  | 0.11480900  | 0.21843500  | 2.50087200  |
| O  | 2.18117100  | -3.91581200 | -1.36239900 |
| O  | 2.73450700  | -1.91487400 | -3.18503600 |
| O  | 1.70807500  | 2.24104500  | 3.35672400  |
| O  | 1.48369100  | 4.11096500  | 1.33039700  |
| H  | 2.13194100  | 6.17282800  | -0.00260400 |
| H  | 1.31134900  | 0.15263100  | 4.75943200  |
| H  | 2.33272500  | 0.12495200  | -4.66603600 |
| H  | 3.09260000  | -6.00971900 | -0.21368200 |
| H  | 6.32613000  | 4.23185700  | -0.43834900 |
| H  | 4.90860100  | 4.44837900  | -2.39977800 |
| H  | 5.47323200  | -0.31883100 | -1.60379200 |

|    |             |             |             |
|----|-------------|-------------|-------------|
| H  | 6.17919300  | -3.72451400 | 1.96850000  |
| H  | 5.11618000  | 0.92369500  | 2.47343700  |
| H  | 4.09960400  | -3.54666100 | 3.21844100  |
| H  | -0.45666600 | -4.62485900 | 2.77946800  |
| H  | 0.43326200  | 3.25361500  | -3.50002700 |
| H  | 1.09627300  | -3.82624700 | -3.64909100 |
| H  | 3.48233200  | -4.29554100 | -3.54104700 |
| H  | -0.24850300 | 3.88381300  | 3.15736700  |
| H  | 1.95415500  | 4.71288800  | 3.77139400  |
| H  | -1.03691200 | 4.30057400  | -1.86805100 |
| H  | -0.99942500 | -4.26249300 | 0.43457900  |
| Ta | -3.26221700 | -0.66930200 | -0.47121700 |
| N  | -4.89237300 | -0.04208900 | -1.56365100 |
| N  | -4.63788100 | -1.07759000 | -2.14939300 |
| H  | -3.43228100 | -2.40082900 | -0.36656800 |
| N  | -6.38748500 | 0.55510100  | 0.38252200  |
| B  | -5.11327100 | 0.06605200  | 1.10435900  |
| H  | -4.85765800 | -1.13032700 | 0.80177600  |
| H  | -5.03484200 | 0.19966700  | 2.29234400  |
| H  | -4.06479200 | 0.67496900  | 0.66620100  |
| H  | -5.84074600 | 0.40527300  | -1.17537400 |
| C  | -7.57584000 | -0.34304400 | 0.59998700  |
| H  | -8.44730900 | 0.23242600  | 0.27807600  |
| C  | -6.76096900 | 1.98912700  | 0.61901500  |
| H  | -7.39103400 | 2.03312500  | 1.51900500  |
| C  | -7.52773300 | -1.59623000 | -0.28033600 |
| H  | -6.68789500 | -2.24703000 | -0.02657500 |
| H  | -8.44353400 | -2.17580400 | -0.13682600 |
| H  | -7.45678800 | -1.34488800 | -1.34112100 |
| C  | -7.80007700 | -0.71731700 | 2.07471400  |
| H  | -7.79998900 | 0.16153700  | 2.72359300  |
| H  | -8.76837300 | -1.21415200 | 2.18416200  |
| H  | -7.02946000 | -1.40079800 | 2.43865700  |
| C  | -7.56949800 | 2.54499000  | -0.56422100 |
| H  | -8.44167800 | 1.93500200  | -0.80686000 |
| H  | -7.92863800 | 3.55211200  | -0.33520600 |
| H  | -6.94411200 | 2.61051000  | -1.46052900 |
| C  | -5.55084900 | 2.89544700  | 0.87052200  |
| H  | -5.89954500 | 3.91909800  | 1.02962500  |
| H  | -4.98425500 | 2.59681600  | 1.75294700  |
| H  | -4.87335100 | 2.91010000  | 0.01142900  |

#### 4

|    |             |             |             |
|----|-------------|-------------|-------------|
| Si | -5.50466600 | -3.44692700 | -0.69737400 |
| Si | -3.53124200 | -0.07719800 | 2.37894100  |
| Si | -0.52240400 | -0.81823200 | 3.25536300  |
| Si | -2.58207300 | -4.58336700 | -0.10102400 |
| Si | -0.82090700 | -3.23699200 | -2.47933800 |
| Si | 0.85422800  | 0.73252400  | 0.93100500  |
| Si | -4.53382400 | -0.37398300 | -0.62185500 |
| Si | -2.74361700 | 0.66103600  | -3.04510900 |
| Si | -3.96259600 | 3.06276000  | 2.87375700  |
| Si | -2.29538900 | 4.65112300  | 0.61631700  |
| Si | 0.00277500  | -0.22061200 | -1.82869900 |
| Si | 0.71685500  | 3.89292200  | 1.34893500  |
| Si | -2.65361700 | 3.83526900  | -2.49701600 |
| Si | -0.54823800 | -3.91536300 | 2.39251800  |
| O  | -5.41604600 | -1.77523400 | -0.68318700 |
| O  | -1.94807200 | -0.04913500 | 2.88709300  |

|    |             |             |             |
|----|-------------|-------------|-------------|
| O  | -3.58877800 | -0.38890500 | 0.74759800  |
| O  | -4.17358900 | -4.14529100 | 0.05632000  |
| O  | -0.15036800 | -1.86406200 | -1.78498000 |
| O  | 2.36991000  | 0.57815400  | 0.26655900  |
| O  | -0.21349900 | 0.44687100  | -0.32014100 |
| O  | -1.09611500 | 0.42571700  | -2.87632700 |
| O  | -0.82227100 | 4.55276800  | 1.38224900  |
| O  | 0.63008400  | 2.22965100  | 1.57564500  |
| O  | -4.19526100 | 1.41820200  | 2.67167400  |
| O  | -3.42795700 | 3.76553200  | 1.44391700  |
| O  | 1.56683500  | 0.14352500  | -2.27401800 |
| O  | -3.53296300 | -0.31706000 | -1.95673000 |
| O  | -2.00091700 | -3.89267200 | -1.49985000 |
| O  | 0.63083200  | -0.38224000 | 2.12621000  |
| O  | -2.11463700 | 4.06282800  | -0.92846400 |
| O  | -3.12905400 | 2.24655000  | -2.74518600 |
| O  | -0.72267500 | -2.46433500 | 3.20725400  |
| O  | -1.71294100 | -4.05937000 | 1.20339800  |
| H  | -2.48637900 | -6.03076800 | -0.19597900 |
| H  | -0.09190500 | -0.43388100 | 4.58290100  |
| H  | -3.11955400 | 0.29998200  | -4.39578000 |
| H  | -2.70831800 | 6.04333300  | 0.57745000  |
| H  | -6.67888600 | -3.83237200 | 0.07611300  |
| H  | -5.57337000 | -3.90486200 | -2.08546700 |
| H  | -5.45913900 | 0.74262800  | -0.62016500 |
| H  | -5.26717300 | 3.63227200  | 3.19120400  |
| H  | -4.29091900 | -1.06786600 | 3.11654500  |
| H  | -2.97185800 | 3.29768400  | 3.92495500  |
| H  | 1.44274200  | 4.45681400  | 2.47982500  |
| H  | -1.45189700 | -2.88275700 | -3.74880900 |
| H  | -1.54565300 | 4.15179400  | -3.39461500 |
| H  | -3.83154500 | 4.66691600  | -2.73604900 |
| H  | 0.77338400  | -3.96863900 | 1.76718300  |
| H  | -0.74381700 | -4.97489300 | 3.37753200  |
| H  | 0.26349000  | -4.20329500 | -2.64337300 |
| H  | 1.35233000  | 4.17878100  | 0.06244400  |
| Ta | 3.28489900  | 0.47944900  | -1.44584100 |
| N  | 4.38576900  | -0.05466700 | -3.18251200 |
| N  | 3.95308500  | 1.05669500  | -3.44653300 |
| H  | 3.71504200  | 2.15677500  | -1.24516100 |
| N  | 5.80507500  | -0.53600700 | 1.01734900  |
| B  | 5.44818700  | -0.30757500 | -0.34001700 |
| H  | 6.18925900  | -0.71008600 | -1.18654100 |
| H  | 5.02045300  | 0.88717000  | -0.57914900 |
| H  | 4.19379700  | -0.93033900 | -0.73225600 |
| C  | 6.92412600  | -1.44003700 | 1.36681900  |
| H  | 6.96472100  | -1.47840400 | 2.45839100  |
| C  | 5.03942600  | 0.05258900  | 2.13509100  |
| H  | 4.28013300  | 0.68047500  | 1.66939500  |
| C  | 6.68464500  | -2.87589300 | 0.87596900  |
| H  | 6.64981300  | -2.91475900 | -0.21610400 |
| H  | 7.49036200  | -3.53672800 | 1.21075000  |
| H  | 5.73950400  | -3.26683800 | 1.26005200  |
| C  | 8.27813200  | -0.89969900 | 0.88378900  |
| H  | 8.45093200  | 0.10970000  | 1.26380000  |
| H  | 9.09372900  | -1.54204500 | 1.23038100  |
| H  | 8.31873600  | -0.86262100 | -0.20757200 |
| C  | 5.90517500  | 0.96058800  | 3.02298200  |
| H  | 6.38996600  | 1.73779400  | 2.42686700  |
| H  | 5.28149500  | 1.44910800  | 3.77720300  |
| H  | 6.68216200  | 0.40306000  | 3.55412100  |
| C  | 4.29050500  | -1.00539300 | 2.96007900  |
| H  | 3.68325400  | -0.51992200 | 3.72920700  |
| H  | 3.61994100  | -1.58550600 | 2.32338700  |
| H  | 4.97612200  | -1.69263500 | 3.46566200  |
| H  | 4.99676800  | -0.56545300 | -3.84056400 |



5

|    |             |             |             |
|----|-------------|-------------|-------------|
| Si | 5.20559900  | -2.05257100 | 1.47702900  |
| Si | 3.20581700  | 1.37186200  | -1.47891300 |
| Si | 1.13836500  | -0.15156600 | -3.40461300 |
| Si | 3.11588800  | -3.91779500 | -0.05197300 |
| Si | 0.44074200  | -3.75296100 | 1.72144900  |
| Si | -1.33060900 | 0.29469800  | -1.56061300 |
| Si | 3.36068900  | 0.59101700  | 1.60598500  |
| Si | 0.70894100  | 0.46477300  | 3.36747800  |
| Si | 2.50859100  | 4.50691400  | -1.42924000 |
| Si | -0.20562900 | 4.86739300  | 0.26943200  |
| Si | -1.05598500 | -0.95235700 | 1.21635000  |
| Si | -2.29216000 | 3.33857600  | -1.61191800 |
| Si | -0.40106900 | 3.48660900  | 3.18677900  |
| Si | 2.07188000  | -3.22391500 | -3.08436800 |
| O  | 4.58892000  | -0.51574900 | 1.71755900  |
| O  | 1.96958500  | 0.98553600  | -2.52219500 |
| O  | 2.88956500  | 0.71892300  | 0.01659500  |
| O  | 4.36885900  | -2.87457000 | 0.26999200  |
| O  | -0.34744800 | -2.42733900 | 1.06136500  |
| O  | -2.82038600 | -0.44154400 | -1.47951400 |
| O  | -0.66820300 | 0.05469000  | -0.04340800 |
| O  | -0.62281100 | -0.24557400 | 2.64145600  |
| O  | -1.23176300 | 4.46831000  | -0.97581000 |
| O  | -1.47512000 | 1.89750500  | -1.90043000 |
| O  | 3.28251600  | 3.02561800  | -1.35111000 |
| O  | 1.37118100  | 4.65160500  | -0.20038900 |
| O  | -2.71876600 | -1.18459100 | 1.14015600  |
| O  | 2.06649400  | 0.04209900  | 2.50656300  |
| O  | 2.02886300  | -3.82496000 | 1.20606600  |
| O  | -0.36062700 | -0.39119400 | -2.70159700 |
| O  | -0.56180100 | 3.89450300  | 1.57125000  |
| O  | 0.54678500  | 2.11536800  | 3.37170600  |
| O  | 1.97729500  | -1.58223000 | -3.40217300 |
| O  | 2.35148400  | -3.51402400 | -1.46187800 |
| H  | 3.63116100  | -5.27343400 | -0.15031900 |
| H  | 0.97519900  | 0.31917400  | -4.76429100 |
| H  | 0.80394500  | -0.03540900 | 4.72285100  |
| H  | -0.41577600 | 6.26204000  | 0.61645600  |
| H  | 6.58155700  | -1.90577600 | 1.01669300  |
| H  | 5.11040600  | -2.80178200 | 2.73021700  |
| H  | 3.84736300  | 1.85676100  | 2.12059000  |
| H  | 3.53122700  | 5.52310900  | -1.20913600 |
| H  | 4.47860700  | 0.89467600  | -1.98515300 |
| H  | 1.84022800  | 4.64730000  | -2.72357300 |
| H  | -2.74975000 | 3.86156500  | -2.89261600 |
| H  | 0.46708100  | -3.62308400 | 3.17647700  |
| H  | -1.73868800 | 3.21734300  | 3.70842300  |
| H  | 0.27898000  | 4.56553400  | 3.90075100  |
| H  | 0.80362200  | -3.85871400 | -3.43445400 |
| H  | 3.19551500  | -3.73658400 | -3.86487000 |
| H  | -0.27568900 | -4.94554800 | 1.27534300  |
| H  | -3.38486300 | 3.10035600  | -0.66837400 |
| Ta | -4.06945300 | -1.19302400 | -0.21414200 |
| N  | -5.59032000 | -2.18497500 | 0.90754300  |
| N  | -5.55817000 | -1.04354900 | 1.35266000  |
| H  | -5.12672700 | 0.14089100  | -0.68350400 |
| H  | -4.13685500 | -2.65737600 | -1.17060800 |
| H  | -6.27886900 | -2.86915400 | 1.25635100  |

## Ts5-6

|    |             |             |             |
|----|-------------|-------------|-------------|
| Si | -5.31303000 | -1.92719900 | -1.51763600 |
| Si | -3.11200700 | 1.19515300  | 1.62539800  |
| Si | -0.88539100 | -0.24281800 | 3.45604900  |
| Si | -3.28895100 | -3.80067500 | 0.10026800  |
| Si | -0.60025900 | -3.67160300 | -1.70277400 |
| Si | 1.48354100  | 0.31284800  | 1.51292000  |
| Si | -3.37833900 | 0.64506800  | -1.48625200 |
| Si | -0.80423700 | 0.52715100  | -3.36410900 |
| Si | -2.53883600 | 4.35133900  | 1.59528800  |
| Si | 0.09621200  | 4.83985000  | -0.19178500 |
| Si | 0.99733600  | -0.92605700 | -1.26496800 |
| Si | 2.32997700  | 3.39381200  | 1.58161900  |
| Si | 0.30863900  | 3.55014000  | -3.15298500 |
| Si | -1.82022700 | -3.28803000 | 2.99684100  |
| O  | -4.66341100 | -0.38836200 | -1.64447000 |
| O  | -1.80576300 | 0.83610900  | 2.58905200  |
| O  | -2.84344700 | 0.61416500  | 0.08949100  |
| O  | -4.55856100 | -2.81429500 | -0.30534500 |
| O  | 0.22042100  | -2.35627600 | -1.05229000 |
| O  | 2.99793200  | -0.37129600 | 1.36776900  |
| O  | 0.76332300  | 0.09850400  | 0.01646800  |
| O  | 0.53907200  | -0.19431900 | -2.66574400 |
| O  | 1.19419600  | 4.47924900  | 1.00416700  |
| O  | 1.59733100  | 1.91037800  | 1.88161800  |
| O  | -3.27187400 | 2.84821000  | 1.55796200  |
| O  | -1.44357300 | 4.50538300  | 0.32820100  |
| O  | 2.65590400  | -1.25843800 | -1.29154000 |
| O  | -2.14008400 | 0.10763200  | -2.47027600 |
| O  | -2.16561600 | -3.72301900 | -1.12855100 |
| O  | 0.58182900  | -0.43149500 | 2.67136600  |
| O  | 0.46633800  | 3.92290300  | -1.52879800 |
| O  | -0.62730700 | 2.17485500  | -3.36510000 |
| O  | -1.64206800 | -1.71448400 | 3.53962600  |
| O  | -2.60939500 | -3.30452600 | 1.52310600  |
| H  | -3.76283200 | -5.16769500 | 0.23605100  |
| H  | -0.67527300 | 0.26318200  | 4.79550300  |
| H  | -0.93295500 | 0.03166500  | -4.71771700 |
| H  | 0.20528000  | 6.25337000  | -0.50793000 |
| H  | -6.71111500 | -1.77963100 | -1.13205100 |
| H  | -5.15195700 | -2.61781300 | -2.79746300 |
| H  | -3.81266200 | 1.97153000  | -1.87930300 |
| H  | -3.59588500 | 5.33652500  | 1.39753300  |
| H  | -4.33198400 | 0.64179700  | 2.17977100  |
| H  | -1.83200900 | 4.52758100  | 2.86456100  |
| H  | 2.81552000  | 3.91958800  | 2.85050200  |
| H  | -0.66758200 | -3.52494900 | -3.15465500 |
| H  | 1.64811900  | 3.30385000  | -3.68047800 |
| H  | -0.38255200 | 4.63762200  | -3.84243200 |
| H  | -0.50214200 | -3.89971200 | 2.83349500  |
| H  | -2.64339200 | -3.98080900 | 3.98353800  |
| H  | 0.11532300  | -4.87532400 | -1.28761600 |
| H  | 3.39464000  | 3.21677900  | 0.59263400  |
| Ta | 4.03787200  | -1.26738000 | 0.00148800  |
| N  | 5.85519700  | -2.01845500 | -0.62413400 |
| N  | 5.76470800  | -0.76421000 | -0.95432700 |
| H  | 5.39170500  | 0.02088400  | 0.25190300  |
| H  | 3.95484900  | -2.80569500 | 0.82390100  |
| H  | 6.76893000  | -2.42803800 | -0.43309700 |

6

|    |             |             |             |
|----|-------------|-------------|-------------|
| Si | -5.24219000 | -1.96563800 | -1.32958700 |
| Si | -3.09191600 | 1.38452700  | 1.63577000  |
| Si | -0.95424300 | -0.24636300 | 3.37580900  |
| Si | -3.13602600 | -3.93742300 | 0.05137900  |
| Si | -0.49031000 | -3.77186900 | -1.72585500 |
| Si | 1.44395700  | 0.25133100  | 1.44433700  |
| Si | -3.43600000 | 0.70569500  | -1.45394900 |
| Si | -0.89079300 | 0.61129700  | -3.37430300 |
| Si | -2.38833400 | 4.51895600  | 1.63563700  |
| Si | 0.24864900  | 4.88076300  | -0.17849200 |
| Si | 0.97713200  | -0.92444900 | -1.39039400 |
| Si | 2.42216500  | 3.30566500  | 1.57802000  |
| Si | 0.29726300  | 3.59989800  | -3.14578300 |
| Si | -1.98062400 | -3.29861400 | 3.04926400  |
| O  | -4.66476100 | -0.40385500 | -1.49811500 |
| O  | -1.80040800 | 0.94993300  | 2.59269000  |
| O  | -2.84396200 | 0.80319600  | 0.09809700  |
| O  | -4.34978300 | -2.82949400 | -0.19458000 |
| O  | 0.18508000  | -2.34118500 | -1.16104600 |
| O  | 2.95183800  | -0.51519400 | 1.36201500  |
| O  | 0.77842900  | 0.07779800  | -0.07219600 |
| O  | 0.46435800  | -0.14817400 | -2.74662900 |
| O  | 1.32526800  | 4.42822200  | 1.00698300  |
| O  | 1.65840900  | 1.82913000  | 1.83269000  |
| O  | -3.17198200 | 3.04183700  | 1.59208500  |
| O  | -1.30507900 | 4.65499300  | 0.35638700  |
| O  | 2.62970800  | -1.24571800 | -1.46722900 |
| O  | -2.20823500 | 0.18585400  | -2.45690100 |
| O  | -2.08969600 | -3.87686500 | -1.24355000 |
| O  | 0.50304400  | -0.47205700 | 2.57775800  |
| O  | 0.54313200  | 3.95426900  | -1.52681200 |
| O  | -0.69057200 | 2.25717000  | -3.32461600 |
| O  | -1.82024400 | -1.65635100 | 3.34591100  |
| O  | -2.29137700 | -3.59442300 | 1.43434600  |
| H  | -3.71137900 | -5.26814900 | 0.14860400  |
| H  | -0.69811200 | 0.15537200  | 4.74313500  |
| H  | -1.06745400 | 0.16374100  | -4.73943200 |
| H  | 0.45814000  | 6.28598000  | -0.47961400 |
| H  | -6.60611400 | -1.86926400 | -0.82295300 |
| H  | -5.16833000 | -2.64401400 | -2.62379700 |
| H  | -3.96399000 | 1.98079900  | -1.89996600 |
| H  | -3.41290500 | 5.54196900  | 1.46305900  |
| H  | -4.33763500 | 0.88404100  | 2.18431500  |
| H  | -1.65853800 | 4.65365500  | 2.89696500  |
| H  | 2.90096400  | 3.78504800  | 2.86720000  |
| H  | -0.48312300 | -3.76680700 | -3.18621800 |
| H  | 1.60378100  | 3.31749900  | -3.73448000 |
| H  | -0.38856900 | 4.71664700  | -3.79236100 |
| H  | -0.72971100 | -3.97165300 | 3.38880500  |
| H  | -3.11040800 | -3.75917400 | 3.85282000  |
| H  | 0.27339100  | -4.87890300 | -1.15722600 |
| H  | 3.49989100  | 3.12022300  | 0.60368000  |
| Ta | 3.92035800  | -1.34659800 | -0.04912900 |
| N  | 5.86184000  | -1.81210000 | 0.24131600  |
| N  | 5.68657700  | -0.63361800 | -0.57386900 |
| H  | 6.12526000  | 0.19697400  | -0.18256700 |
| H  | 3.76053500  | -3.07130900 | 0.18634900  |
| H  | 6.36168300  | -2.53653400 | -0.26623300 |

7

|    |             |             |             |
|----|-------------|-------------|-------------|
| Si | 5.15761800  | 3.79486400  | -1.03038300 |
| Si | 4.15139500  | -0.01689500 | 1.98532900  |
| Si | 1.34489900  | 0.63763500  | 3.37933700  |
| Si | 2.25285200  | 4.68244700  | -0.06574600 |
| Si | 0.27345500  | 3.35892400  | -2.24539100 |
| Si | -0.46751300 | -0.76548400 | 1.25503700  |
| Si | 4.53066300  | 0.63147900  | -1.11538500 |
| Si | 2.39910300  | -0.41194800 | -3.23889300 |
| Si | 4.73449900  | -3.16565600 | 2.19265900  |
| Si | 2.67540900  | -4.64299600 | 0.20570800  |
| Si | -0.17156800 | 0.26119300  | -1.58991400 |
| Si | -0.15619400 | -3.93039300 | 1.50838200  |
| Si | 2.51474400  | -3.60886000 | -2.86014800 |
| Si | 1.11895700  | 3.80483300  | 2.87695200  |
| O  | 5.23260900  | 2.13208200  | -1.19253000 |
| O  | 2.69616000  | -0.12484300 | 2.78047700  |
| O  | 3.89032500  | 0.41567700  | 0.40234600  |
| O  | 3.86411200  | 4.27348900  | -0.06476900 |
| O  | -0.19459900 | 1.91221800  | -1.54032800 |
| O  | -2.06263600 | -0.61229400 | 0.90196300  |
| O  | 0.35540500  | -0.40333300 | -0.16784200 |
| O  | 0.78605000  | -0.25257200 | -2.83128900 |
| O  | 1.37591900  | -4.56070800 | 1.23570200  |
| O  | -0.05351100 | -2.27850600 | 1.77240000  |
| O  | 4.88514200  | -1.50628900 | 2.03530500  |
| O  | 3.97042200  | -3.82965000 | 0.85240700  |
| O  | -1.75939300 | -0.23538700 | -1.80627500 |
| O  | 3.29804900  | 0.56596600  | -2.23795500 |
| O  | 1.56448600  | 4.05102900  | -1.44168400 |
| O  | 0.02294000  | 0.29626700  | 2.42625700  |
| O  | 2.23739100  | -3.97044500 | -1.25110900 |
| O  | 2.89162400  | -1.98646700 | -3.06134000 |
| O  | 1.60310900  | 2.28188100  | 3.37096200  |
| O  | 1.48195000  | 4.07755000  | 1.26648800  |
| H  | 2.12600500  | 6.13126000  | -0.07796100 |
| H  | 1.11541900  | 0.19170200  | 4.73868900  |
| H  | 2.55885500  | 0.01070700  | -4.61488900 |
| H  | 3.04025000  | -6.03674200 | 0.01644500  |
| H  | 6.37341800  | 4.22848200  | -0.35125700 |
| H  | 5.01695000  | 4.39251400  | -2.35875100 |
| H  | 5.55148400  | -0.35602100 | -1.41027800 |
| H  | 6.09009300  | -3.70227100 | 2.23778300  |
| H  | 5.02630700  | 0.94243500  | 2.63287300  |
| H  | 3.96229900  | -3.48015200 | 3.39541400  |
| H  | -0.64553700 | -4.55394600 | 2.73251600  |
| H  | 0.70710200  | 3.11624900  | -3.61932900 |
| H  | 1.29160500  | -3.91159100 | -3.59915600 |
| H  | 3.66790700  | -4.36724800 | -3.34217800 |
| H  | -0.33000300 | 3.93004700  | 3.02410000  |
| H  | 1.84912900  | 4.76492400  | 3.70230600  |
| H  | -0.87901900 | 4.25539000  | -2.17146200 |
| H  | -1.00808200 | -4.20474600 | 0.35168100  |
| Ta | -3.25803000 | -0.64800600 | -0.70237500 |
| N  | -4.89381000 | 0.13291600  | -1.78871100 |
| N  | -4.56583800 | -1.23003700 | -2.10341400 |
| H  | -3.21195300 | -2.37814800 | -0.52746200 |
| N  | -6.31474200 | 0.58390600  | 0.56474600  |
| B  | -4.93851900 | 0.05174400  | 1.16058100  |
| H  | -4.78191700 | -1.10990800 | 0.76085900  |
| H  | -4.84724300 | 0.10816000  | 2.34698100  |
| H  | -4.04536400 | 0.74309400  | 0.66327700  |
| H  | -6.09439500 | 0.53179000  | -0.46652000 |
| C  | -7.50721600 | -0.32501500 | 0.83596000  |
| H  | -8.39003100 | 0.27830400  | 0.61394900  |

|   |             |             |             |
|---|-------------|-------------|-------------|
| C | -6.66534500 | 2.03236000  | 0.88484900  |
| H | -7.23887000 | 1.99728300  | 1.81482900  |
| C | -7.51845800 | -1.52069400 | -0.11672300 |
| H | -6.68033400 | -2.19423300 | 0.06944900  |
| H | -8.44119300 | -2.08672500 | 0.03214200  |
| H | -7.48520000 | -1.19760900 | -1.15982500 |
| C | -7.58648200 | -0.75925800 | 2.30016400  |
| H | -7.53064700 | 0.08786300  | 2.98711100  |
| H | -8.54248100 | -1.26188300 | 2.46796500  |
| H | -6.78607500 | -1.45415600 | 2.55811000  |
| C | -7.53687800 | 2.61809400  | -0.23282500 |
| H | -8.43369300 | 2.02787400  | -0.43036800 |
| H | -7.86159300 | 3.62372700  | 0.04349400  |
| H | -6.96771800 | 2.69139400  | -1.16367000 |
| C | -5.44024200 | 2.91694200  | 1.11838100  |
| H | -5.78583200 | 3.92518500  | 1.36112500  |
| H | -4.82528500 | 2.56340000  | 1.94482300  |
| H | -4.81593100 | 2.98614100  | 0.22435200  |
| H | -5.35122700 | -1.86500600 | -2.02767900 |
| H | -4.62086400 | 0.72280000  | -2.57531700 |

## Ts7-8

|    |             |             |             |
|----|-------------|-------------|-------------|
| Si | 5.16010600  | 3.77348900  | -1.04069900 |
| Si | 4.20717900  | -0.07231200 | 1.91446200  |
| Si | 1.44252800  | 0.59586400  | 3.38574500  |
| Si | 2.28408100  | 4.69778000  | -0.01829900 |
| Si | 0.21973400  | 3.43417300  | -2.14380100 |
| Si | -0.40312600 | -0.79731400 | 1.28519200  |
| Si | 4.49570200  | 0.61836600  | -1.18772500 |
| Si | 2.29513900  | -0.34995400 | -3.27779700 |
| Si | 4.76393200  | -3.22854600 | 2.05716100  |
| Si | 2.65952400  | -4.65483400 | 0.07926100  |
| Si | -0.21081600 | 0.32228700  | -1.53925400 |
| Si | -0.11130900 | -3.96957100 | 1.51015700  |
| Si | 2.36617400  | -3.55355900 | -2.95305600 |
| Si | 1.19600600  | 3.77325500  | 2.92764700  |
| O  | 5.20771500  | 2.11459000  | -1.24771400 |
| O  | 2.77552800  | -0.17054300 | 2.75304900  |
| O  | 3.89822300  | 0.36734300  | 0.34181500  |
| O  | 3.88302800  | 4.24460200  | -0.05002600 |
| O  | -0.21566400 | 1.96982400  | -1.45185400 |
| O  | -2.01588600 | -0.66989100 | 0.98139100  |
| O  | 0.36046600  | -0.38132300 | -0.15333400 |
| O  | 0.69400800  | -0.17652400 | -2.82566800 |
| O  | 1.38909900  | -4.62909400 | 1.14912900  |
| O  | 0.04256900  | -2.31653500 | 1.74777600  |
| O  | 4.92985500  | -1.56753500 | 1.93790500  |
| O  | 3.96236100  | -3.84779500 | 0.71691900  |
| O  | -1.81011200 | -0.16012400 | -1.70727800 |
| O  | 3.23016900  | 0.59067700  | -2.27495200 |
| O  | 1.55202900  | 4.10332700  | -1.38966900 |
| O  | 0.09727600  | 0.24542600  | 2.46606300  |
| O  | 2.16758700  | -3.93342300 | -1.33658000 |
| O  | 2.76529900  | -1.93619400 | -3.15110200 |
| O  | 1.70026200  | 2.23851800  | 3.36315100  |
| O  | 1.51790700  | 4.09481500  | 1.31750800  |
| H  | 2.19608100  | 6.14924700  | -0.01046700 |
| H  | 1.24383000  | 0.15174200  | 4.75029800  |

|    |             |             |             |
|----|-------------|-------------|-------------|
| H  | 2.42698500  | 0.10251100  | -4.64708900 |
| H  | 3.03336100  | -6.03624900 | -0.17147700 |
| H  | 6.38902900  | 4.17052700  | -0.36286000 |
| H  | 5.01487800  | 4.40760900  | -2.35148500 |
| H  | 5.49799100  | -0.37004800 | -1.53787400 |
| H  | 6.11385400  | -3.78101100 | 2.06014800  |
| H  | 5.10995900  | 0.87707600  | 2.53762400  |
| H  | 4.01344500  | -3.56505700 | 3.26762200  |
| H  | -0.53731800 | -4.57363900 | 2.76698900  |
| H  | 0.58399600  | 3.22160400  | -3.54263400 |
| H  | 1.09892500  | -3.81957600 | -3.62951600 |
| H  | 3.47541000  | -4.32781400 | -3.50736100 |
| H  | -0.24942200 | 3.88409400  | 3.11208400  |
| H  | 1.94208100  | 4.71276800  | 3.76217600  |
| H  | -0.92617800 | 4.32864700  | -1.99125400 |
| H  | -1.03880000 | -4.23398800 | 0.41073300  |
| Ta | -3.26066200 | -0.63946900 | -0.56212000 |
| N  | -4.95666700 | 0.16846800  | -1.65502500 |
| N  | -4.60430000 | -1.18710100 | -1.91709800 |
| H  | -3.20140600 | -2.37228200 | -0.43384600 |
| N  | -6.28603200 | 0.56796800  | 0.49505000  |
| B  | -4.98157600 | 0.08211500  | 1.19942000  |
| H  | -4.76652100 | -1.10436800 | 0.88216400  |
| H  | -4.88601200 | 0.21749500  | 2.38174100  |
| H  | -4.02069000 | 0.72688800  | 0.70733800  |
| H  | -5.82698700 | 0.42751400  | -0.71144000 |
| C  | -7.48715800 | -0.31227100 | 0.74681800  |
| H  | -8.35762300 | 0.28114000  | 0.45650700  |
| C  | -6.65451300 | 2.01546200  | 0.71784400  |
| H  | -7.29236100 | 2.05359400  | 1.60915700  |
| C  | -7.48602000 | -1.56018200 | -0.14048500 |
| H  | -6.63807200 | -2.21185700 | 0.07844700  |
| H  | -8.40019700 | -2.13241900 | 0.03759500  |
| H  | -7.46167000 | -1.29198100 | -1.19949700 |
| C  | -7.65920000 | -0.68550400 | 2.22530100  |
| H  | -7.62035300 | 0.19160800  | 2.87513000  |
| H  | -8.63057000 | -1.16676900 | 2.36983300  |
| H  | -6.88463500 | -1.38022100 | 2.55661400  |
| C  | -7.45167600 | 2.55686700  | -0.47916200 |
| H  | -8.31697000 | 1.93965400  | -0.72884900 |
| H  | -7.81914800 | 3.56231900  | -0.25831800 |
| H  | -6.81747900 | 2.62098600  | -1.36820100 |
| C  | -5.44980800 | 2.92358300  | 0.98104800  |
| H  | -5.80820700 | 3.94408400  | 1.13991300  |
| H  | -4.88936400 | 2.62409200  | 1.86632800  |
| H  | -4.76543500 | 2.94447100  | 0.12846700  |
| H  | -5.36941400 | -1.83263200 | -2.05466900 |
| H  | -4.78117400 | 0.76895600  | -2.45920300 |

## 8

|    |             |             |             |
|----|-------------|-------------|-------------|
| Si | 5.15613400  | 3.79946600  | -1.04027500 |
| Si | 4.18008500  | -0.02011400 | 1.94894800  |
| Si | 1.39449700  | 0.62155800  | 3.39814200  |
| Si | 2.26740200  | 4.68458500  | -0.03122900 |
| Si | 0.25886000  | 3.38818800  | -2.19786100 |
| Si | -0.39931100 | -0.79058400 | 1.27177200  |
| Si | 4.49830800  | 0.64193700  | -1.15527800 |
| Si | 2.33872500  | -0.38355400 | -3.26066700 |
| Si | 4.76266700  | -3.17340400 | 2.11039100  |
| Si | 2.69299800  | -4.64919300 | 0.13134500  |
| Si | -0.19474500 | 0.28386600  | -1.56547000 |

|    |             |             |             |
|----|-------------|-------------|-------------|
| Si | -0.10855900 | -3.96203900 | 1.50556900  |
| Si | 2.47258600  | -3.58670100 | -2.91828600 |
| Si | 1.13994100  | 3.79147900  | 2.91086000  |
| O  | 5.20350600  | 2.13942500  | -1.24253900 |
| O  | 2.73997200  | -0.12880200 | 2.77215800  |
| O  | 3.88720100  | 0.42384800  | 0.37452500  |
| O  | 3.87789700  | 4.27337700  | -0.05244400 |
| O  | -0.20964100 | 1.93292600  | -1.50797300 |
| O  | -2.01389000 | -0.67228500 | 0.93564400  |
| O  | 0.37479500  | -0.38972200 | -0.16103900 |
| O  | 0.72793600  | -0.23255600 | -2.83308300 |
| O  | 1.40454900  | -4.60772300 | 1.17901000  |
| O  | 0.02573900  | -2.30753000 | 1.75381600  |
| O  | 4.90881500  | -1.51223800 | 1.97242300  |
| O  | 3.97911600  | -3.81764100 | 0.77076300  |
| O  | -1.78665500 | -0.21131800 | -1.72934400 |
| O  | 3.24254400  | 0.58199300  | -2.25344200 |
| O  | 1.56534200  | 4.06052600  | -1.40486400 |
| O  | 0.06707100  | 0.26426300  | 2.45119100  |
| O  | 2.21833500  | -3.96313100 | -1.30846600 |
| O  | 2.83267800  | -1.96011200 | -3.11170000 |
| O  | 1.63054900  | 2.26596500  | 3.39533900  |
| O  | 1.50983800  | 4.06824700  | 1.30264100  |
| H  | 2.14077200  | 6.13319100  | -0.03270300 |
| H  | 1.18075800  | 0.16050800  | 4.75429400  |
| H  | 2.48214000  | 0.05707500  | -4.63278500 |
| H  | 3.07901200  | -6.03338800 | -0.08179300 |
| H  | 6.38365800  | 4.19975800  | -0.36201500 |
| H  | 5.01283200  | 4.42769100  | -2.35396100 |
| H  | 5.50724500  | -0.35023800 | -1.47445500 |
| H  | 6.11877700  | -3.70981700 | 2.12969300  |
| H  | 5.06990400  | 0.93188700  | 2.58627500  |
| H  | 4.00539400  | -3.50508200 | 3.31790300  |
| H  | -0.56367200 | -4.57242400 | 2.74840500  |
| H  | 0.67072200  | 3.15751200  | -3.58078400 |
| H  | 1.24096200  | -3.89230400 | -3.64247800 |
| H  | 3.62390700  | -4.33290400 | -3.42255800 |
| H  | -0.30946600 | 3.90676800  | 3.05429200  |
| H  | 1.86621300  | 4.74817000  | 3.74296500  |
| H  | -0.88879900 | 4.28761300  | -2.09754300 |
| H  | -1.00541400 | -4.22412600 | 0.38001100  |
| Ta | -3.26467800 | -0.62955800 | -0.57121000 |
| N  | -4.79231500 | 0.23281700  | -1.97357600 |
| N  | -4.57379100 | -1.16041800 | -1.95891500 |
| H  | -3.32051600 | -2.35455600 | -0.36138600 |
| N  | -6.35161600 | 0.57341400  | 0.51124600  |
| B  | -5.00900100 | 0.15790400  | 1.07884200  |
| H  | -4.74234800 | -1.04441600 | 0.81952700  |
| H  | -4.73030800 | 0.38517500  | 2.22544700  |
| H  | -4.05599300 | 0.77836100  | 0.44598400  |
| H  | -5.63903000 | 0.54507400  | -1.47061500 |
| C  | -7.45498500 | -0.39574600 | 0.79536400  |
| H  | -8.38852000 | 0.14240200  | 0.61324000  |
| C  | -6.77707800 | 1.96728500  | 0.82661000  |
| H  | -7.28525500 | 1.97928400  | 1.80537900  |
| C  | -7.45149600 | -1.58870900 | -0.16648500 |
| H  | -6.54542000 | -2.18935400 | -0.06655800 |
| H  | -8.30718500 | -2.23851800 | 0.04053200  |
| H  | -7.53019400 | -1.25146000 | -1.20393900 |
| C  | -7.49983600 | -0.87520300 | 2.25908200  |
| H  | -7.47543200 | -0.03424300 | 2.95643200  |
| H  | -8.41955100 | -1.43836700 | 2.44488100  |
| H  | -6.65446000 | -1.52741200 | 2.49394900  |
| C  | -7.76498500 | 2.49812200  | -0.22664900 |
| H  | -8.62631500 | 1.84343100  | -0.37127700 |
| H  | -8.14657400 | 3.47960400  | 0.07054400  |
| H  | -7.26404200 | 2.61175800  | -1.19411600 |

|   |             |             |             |
|---|-------------|-------------|-------------|
| C | -5.59875000 | 2.94427200  | 0.92546400  |
| H | -5.97786100 | 3.94767800  | 1.13687100  |
| H | -4.90294000 | 2.67699000  | 1.72084900  |
| H | -5.04406300 | 2.99448900  | -0.01736100 |
| H | -5.23371900 | -1.75518600 | -2.43786500 |
| H | -4.57166500 | 0.70978500  | -2.84313900 |

## 9

|    |             |             |             |
|----|-------------|-------------|-------------|
| Si | 5.07463100  | -2.41951700 | 1.47192600  |
| Si | 3.34567200  | 1.18222400  | -1.46067000 |
| Si | 1.17129900  | -0.16009900 | -3.39632400 |
| Si | 2.84987500  | -4.08370400 | -0.09000900 |
| Si | 0.20005000  | -3.73608000 | 1.70881200  |
| Si | -1.28157200 | 0.39690300  | -1.54753300 |
| Si | 3.40840400  | 0.34124300  | 1.61498500  |
| Si | 0.74699700  | 0.39540400  | 3.36379900  |
| Si | 2.87170700  | 4.35600800  | -1.36215400 |
| Si | 0.16484800  | 4.88460100  | 0.30193200  |
| Si | -1.14837700 | -0.86393600 | 1.22619900  |
| Si | -2.01790000 | 3.50522800  | -1.58657500 |
| Si | -0.13426100 | 3.49578900  | 3.20951800  |
| Si | 1.91241800  | -3.28281500 | -3.13012500 |
| O  | 4.55081100  | -0.85324400 | 1.73871600  |
| O  | 2.08846200  | 0.90977400  | -2.51378800 |
| O  | 2.98266000  | 0.51655200  | 0.01809300  |
| O  | 4.19801300  | -3.17174700 | 0.24773000  |
| O  | -0.55785500 | -2.39445100 | 1.05099400  |
| O  | -2.80503400 | -0.25940900 | -1.50922500 |
| O  | -0.65801000 | 0.12200400  | -0.01767100 |
| O  | -0.64009600 | -0.22164500 | 2.66149400  |
| O  | -0.87001700 | 4.55112200  | -0.95392400 |
| O  | -1.31706600 | 2.00860200  | -1.88517800 |
| O  | 3.53875300  | 2.82320400  | -1.29246500 |
| O  | 1.73120000  | 4.56708600  | -0.14604400 |
| O  | -2.81728000 | -0.95318800 | 1.16717500  |
| O  | 2.06157200  | -0.11967800 | 2.48627300  |
| O  | 1.77184500  | -3.88603500 | 1.16255900  |
| O  | -0.32283400 | -0.33541300 | -2.67145400 |
| O  | -0.26723300 | 3.94119200  | 1.60248600  |
| O  | 0.70564200  | 2.05427700  | 3.37461600  |
| O  | 1.92975600  | -1.63648600 | -3.43477600 |
| O  | 2.14311300  | -3.60373500 | -1.50512100 |
| H  | 3.23004900  | -5.48350200 | -0.19057200 |
| H  | 1.01593500  | 0.34570500  | -4.74450500 |
| H  | 0.82483800  | -0.10888000 | 4.71934000  |
| H  | 0.04242800  | 6.29067100  | 0.64613700  |
| H  | 6.45934500  | -2.35071900 | 1.01925000  |
| H  | 4.92901500  | -3.18211400 | 2.71226300  |
| H  | 3.97599500  | 1.56311500  | 2.15280200  |
| H  | 3.96041600  | 5.29484800  | -1.11607800 |
| H  | 4.58335400  | 0.62918400  | -1.97683900 |
| H  | 2.23250900  | 4.55929900  | -2.66283700 |
| H  | -2.43900900 | 4.06864900  | -2.86305300 |
| H  | 0.26531600  | -3.59174000 | 3.16180400  |
| H  | -1.48820700 | 3.32232400  | 3.73085600  |
| H  | 0.62524900  | 4.50963100  | 3.93898700  |
| H  | 0.61399100  | -3.83508100 | -3.50901000 |
| H  | 3.01547400  | -3.86047900 | -3.89467600 |
| H  | -0.57247400 | -4.90699800 | 1.29796800  |
| H  | -3.12018800 | 3.35517000  | -0.63683100 |
| Ta | -4.14242800 | -0.88112700 | -0.24295300 |



|   |             |             |             |
|---|-------------|-------------|-------------|
| N | -5.35099700 | -2.29086900 | 1.09368400  |
| N | -5.86846800 | -1.02568500 | 0.72633300  |
| H | -4.83850500 | 0.70340800  | -0.48878500 |
| H | -4.54406400 | -2.17988000 | -1.37371900 |
| H | -5.83999100 | -3.09435500 | 0.71432300  |
| H | -6.76046500 | -0.74523300 | 1.10799900  |
| H | -5.10177700 | -2.39261800 | 2.07374500  |

## Ts9-10

|    |             |             |             |
|----|-------------|-------------|-------------|
| Si | -5.21788400 | -2.22461000 | -1.54641300 |
| Si | -3.21969400 | 1.04004300  | 1.58267200  |
| Si | -0.91554000 | -0.21091500 | 3.45503100  |
| Si | -3.11241700 | -3.93862000 | 0.14708500  |
| Si | -0.39023000 | -3.66462000 | -1.59944000 |
| Si | 1.43278600  | 0.46752000  | 1.52248500  |
| Si | -3.40970200 | 0.43703100  | -1.52306200 |
| Si | -0.80655200 | 0.44232000  | -3.36177400 |
| Si | -2.83804300 | 4.22266700  | 1.49381500  |
| Si | -0.20586500 | 4.85642100  | -0.25587400 |
| Si | 1.05915000  | -0.83962500 | -1.20945400 |
| Si | 2.08968700  | 3.58920100  | 1.57374600  |
| Si | 0.12042400  | 3.52996100  | -3.19123800 |
| Si | -1.67231300 | -3.30832200 | 3.02490800  |
| O  | -4.63911100 | -0.66003500 | -1.69894600 |
| O  | -1.90534600 | 0.78785800  | 2.56714100  |
| O  | -2.90547100 | 0.44058500  | 0.06273000  |
| O  | -4.43760200 | -3.05370600 | -0.31062300 |
| O  | 0.34749700  | -2.30183100 | -0.95263400 |
| O  | 2.97327000  | -0.12964600 | 1.37848800  |
| O  | 0.72399200  | 0.21748900  | 0.02438200  |
| O  | 0.56858100  | -0.18902200 | -2.64427100 |
| O  | 0.90294500  | 4.59721200  | 0.95527100  |
| O  | 1.44319900  | 2.07260300  | 1.89143000  |
| O  | -3.48044200 | 2.67887800  | 1.47128100  |
| O  | -1.72408500 | 4.41687400  | 0.24879600  |
| O  | 2.72119600  | -1.08006200 | -1.20788300 |
| O  | -2.13007000 | -0.04266700 | -2.48308400 |
| O  | -1.95943600 | -3.79753300 | -1.04706600 |
| O  | 0.56228500  | -0.31874900 | 2.68066500  |
| O  | 0.24486700  | 3.95236300  | -1.57721500 |
| O  | -0.73176000 | 2.09963800  | -3.38323800 |
| O  | -1.57613400 | -1.72760200 | 3.56506000  |
| O  | -2.52401200 | -3.37629200 | 1.58667000  |
| H  | -3.49199400 | -5.33450100 | 0.28810100  |
| H  | -0.75030400 | 0.33166200  | 4.78655100  |
| H  | -0.88959400 | -0.07252100 | -4.71218500 |
| H  | -0.19667000 | 6.26990600  | -0.59162900 |
| H  | -6.62569100 | -2.13565100 | -1.17791500 |
| H  | -5.01307000 | -2.93114000 | -2.81140400 |
| H  | -3.90250000 | 1.73816800  | -1.93188700 |
| H  | -3.94645900 | 5.13967600  | 1.25205700  |
| H  | -4.40940500 | 0.42735700  | 2.14038600  |
| H  | -2.17377900 | 4.46747500  | 2.77475600  |
| H  | 2.52167000  | 4.17093400  | 2.83783000  |
| H  | -0.44563600 | -3.54071000 | -3.05445100 |
| H  | 1.47759500  | 3.35080500  | -3.70218500 |
| H  | -0.62295200 | 4.56120900  | -3.91250700 |
| H  | -0.32551600 | -3.83478800 | 2.80450400  |
| H  | -2.40650800 | -4.05507400 | 4.04193400  |
| H  | 0.37909200  | -4.82691400 | -1.16180400 |
| H  | 3.18015700  | 3.46352800  | 0.60470100  |

|    |            |             |             |
|----|------------|-------------|-------------|
| Ta | 4.13729100 | -1.02405800 | 0.08462900  |
| N  | 5.21103800 | -2.50871800 | -1.25250600 |
| N  | 5.86690100 | -0.74878100 | -0.53544400 |
| H  | 5.34898500 | 0.42658300  | 0.34898800  |
| H  | 4.30324000 | -2.38815000 | 1.17193300  |
| H  | 5.97051500 | -3.10092600 | -0.94603800 |
| H  | 6.67795500 | -0.41287500 | -1.03998600 |
| H  | 5.18484900 | -2.42450000 | -2.26247900 |

## 10

|    |             |             |             |
|----|-------------|-------------|-------------|
| Si | -5.36394900 | -1.96235400 | -1.45091700 |
| Si | -3.12479300 | 1.08741700  | 1.68064000  |
| Si | -0.81399900 | -0.26248200 | 3.46202300  |
| Si | -3.29985500 | -3.80409300 | 0.15022700  |
| Si | -0.63677700 | -3.60925200 | -1.70312900 |
| Si | 1.51203700  | 0.33823600  | 1.47521500  |
| Si | -3.40796600 | 0.58979100  | -1.43772100 |
| Si | -0.86362800 | 0.48943100  | -3.35679600 |
| Si | -2.70845900 | 4.26713200  | 1.59193000  |
| Si | -0.09314600 | 4.80629100  | -0.20586200 |
| Si | 1.00193500  | -0.89392600 | -1.26432800 |
| Si | 2.24542900  | 3.45927300  | 1.51888600  |
| Si | 0.16316700  | 3.54152600  | -3.18110500 |
| Si | -1.71920200 | -3.31177200 | 2.97730500  |
| O  | -4.70351000 | -0.43042900 | -1.60600000 |
| O  | -1.77873500 | 0.79254300  | 2.61098600  |
| O  | -2.86872100 | 0.52762200  | 0.13545000  |
| O  | -4.59418600 | -2.84616000 | -0.24655900 |
| O  | 0.19960500  | -2.31645500 | -1.03796900 |
| O  | 3.00861200  | -0.35980100 | 1.27260300  |
| O  | 0.74048300  | 0.14962000  | 0.00394200  |
| O  | 0.50945700  | -0.17591300 | -2.66955200 |
| O  | 1.02332400  | 4.46711100  | 0.97936100  |
| O  | 1.64316600  | 1.93294000  | 1.86486500  |
| O  | -3.36854100 | 2.73180600  | 1.62312700  |
| O  | -1.61732500 | 4.41465700  | 0.31914300  |
| O  | 2.63745500  | -1.21900600 | -1.27744000 |
| O  | -2.17923100 | 0.06057800  | -2.43627500 |
| O  | -2.18168800 | -3.69373500 | -1.07849800 |
| O  | 0.64412700  | -0.41307300 | 2.65804100  |
| O  | 0.29987000  | 3.92298700  | -1.55710300 |
| O  | -0.73289000 | 2.14349800  | -3.40297000 |
| O  | -1.53402700 | -1.75285800 | 3.55726200  |
| O  | -2.64100300 | -3.30024200 | 1.58127900  |
| H  | -3.74211500 | -5.18275200 | 0.27690300  |
| H  | -0.60011400 | 0.24633600  | 4.79990100  |
| H  | -1.00754800 | -0.03377300 | -4.69889900 |
| H  | -0.03216900 | 6.22711800  | -0.50417600 |
| H  | -6.75333500 | -1.80057100 | -1.03966900 |
| H  | -5.23567700 | -2.66492200 | -2.72806400 |
| H  | -3.83420300 | 1.92587200  | -1.80666700 |
| H  | -3.80924200 | 5.19277300  | 1.34851400  |
| H  | -4.30299000 | 0.47629100  | 2.26340600  |
| H  | -2.01425400 | 4.53741800  | 2.85169400  |
| H  | 2.74627300  | 4.02903700  | 2.76322500  |
| H  | -0.75707100 | -3.41941500 | -3.14745400 |
| H  | 1.51437900  | 3.33466600  | -3.69673400 |
| H  | -0.54944500 | 4.61112900  | -3.87692900 |
| H  | -0.40642100 | -3.88303500 | 2.67756400  |
| H  | -2.43424000 | -4.05987600 | 4.00685300  |
| H  | 0.09070800  | -4.82870100 | -1.35826200 |

|    |            |             |             |
|----|------------|-------------|-------------|
| H  | 3.28347100 | 3.35012100  | 0.49114600  |
| Ta | 4.15041100 | -1.23755200 | -0.05610800 |
| N  | 5.26472100 | -1.88025700 | -1.58552000 |
| N  | 5.70625800 | -0.20412800 | 0.61986800  |
| H  | 5.61897100 | 0.38426800  | 1.44097600  |
| H  | 6.57069400 | -0.00469400 | 0.13309400  |
| H  | 6.26363200 | -2.05234900 | -1.60686800 |
| H  | 4.86384100 | -2.09012500 | -2.49291100 |
| H  | 4.22895100 | -2.74144000 | 0.82007800  |

## Ts10-11

|    |             |             |             |
|----|-------------|-------------|-------------|
| Si | -5.34643300 | -1.86552000 | -1.35145900 |
| Si | -3.11238200 | 1.41945800  | 1.63983900  |
| Si | -1.00435700 | -0.24373400 | 3.39869000  |
| Si | -3.25435400 | -3.85302600 | 0.01072100  |
| Si | -0.64419800 | -3.67444800 | -1.84108300 |
| Si | 1.39119600  | 0.23020100  | 1.46600100  |
| Si | -3.44203300 | 0.73609600  | -1.45836300 |
| Si | -0.86775200 | 0.60988000  | -3.33563500 |
| Si | -2.28164900 | 4.52289300  | 1.65170700  |
| Si | 0.35031800  | 4.88432000  | -0.16893700 |
| Si | 0.93723000  | -0.92589700 | -1.31063200 |
| Si | 2.44263600  | 3.23946100  | 1.61471100  |
| Si | 0.33474500  | 3.59419200  | -3.13058800 |
| Si | -2.02908100 | -3.28251400 | 3.00387500  |
| O  | -4.69982300 | -0.33733900 | -1.56544000 |
| O  | -1.84339300 | 0.95387700  | 2.60813100  |
| O  | -2.91130300 | 0.78991200  | 0.11597200  |
| O  | -4.48040900 | -2.75336900 | -0.21402300 |
| O  | 0.14847300  | -2.36259600 | -1.16388000 |
| O  | 2.86587300  | -0.51488600 | 1.30541100  |
| O  | 0.63027000  | 0.06815800  | -0.01397300 |
| O  | 0.47703400  | -0.15647500 | -2.69973900 |
| O  | 1.42996200  | 4.42732600  | 1.00884900  |
| O  | 1.57930400  | 1.82072600  | 1.85611800  |
| O  | -3.11786500 | 3.07821800  | 1.55228900  |
| O  | -1.20617800 | 4.68024300  | 0.36928400  |
| O  | 2.57755900  | -1.23011100 | -1.28758200 |
| O  | -2.19732700 | 0.19500900  | -2.42932800 |
| O  | -2.22279200 | -3.75956100 | -1.29281100 |
| O  | 0.46349400  | -0.47681700 | 2.63367100  |
| O  | 0.62293800  | 3.95337800  | -1.52095100 |
| O  | -0.66222200 | 2.25705800  | -3.29005800 |
| O  | -1.87866600 | -1.65298800 | 3.35750900  |
| O  | -2.40987700 | -3.52996700 | 1.39617100  |
| H  | -3.81783300 | -5.19061100 | 0.08928500  |
| H  | -0.78206900 | 0.15366700  | 4.77371300  |
| H  | -1.03985200 | 0.16572800  | -4.70321500 |
| H  | 0.57324600  | 6.28626800  | -0.47628600 |
| H  | -6.69646200 | -1.70052500 | -0.82471900 |
| H  | -5.32775600 | -2.56988200 | -2.63378800 |
| H  | -3.91732900 | 2.03200800  | -1.90435100 |
| H  | -3.27186400 | 5.58714500  | 1.53325400  |
| H  | -4.37706700 | 0.98946800  | 2.20534900  |
| H  | -1.53783300 | 4.58001800  | 2.91092300  |
| H  | 2.92131600  | 3.71038700  | 2.90804900  |
| H  | -0.70428000 | -3.51413900 | -3.29213800 |
| H  | 1.62703500  | 3.30444900  | -3.74888700 |
| H  | -0.35611200 | 4.71405800  | -3.76697400 |
| H  | -0.75624400 | -3.95207500 | 3.26278200  |
| H  | -3.11457500 | -3.79347700 | 3.83790500  |

|    |            |             |             |
|----|------------|-------------|-------------|
| H  | 0.07703300 | -4.88013900 | -1.43893500 |
| H  | 3.53061400 | 2.99418200  | 0.66531300  |
| Ta | 4.04925400 | -1.32701100 | -0.02795000 |
| N  | 4.73847500 | -2.97908900 | 0.42492100  |
| N  | 5.32125200 | -0.43977100 | -1.26145000 |
| H  | 4.99980300 | 0.23755500  | -1.94332900 |
| H  | 6.33051400 | -0.49666500 | -1.26284200 |
| H  | 5.33449500 | -2.05826800 | 1.17022700  |
| H  | 4.97055200 | -3.90439200 | 0.75134900  |
| H  | 5.36616400 | -0.96837200 | 1.33457800  |

## 11

|    |             |             |             |
|----|-------------|-------------|-------------|
| Si | 5.26404900  | -1.61761000 | 1.20665400  |
| Si | 3.00939000  | 1.57129200  | -1.55544100 |
| Si | 1.16104600  | -0.51838700 | -3.24486500 |
| Si | 3.22216700  | -3.78654000 | 0.07589900  |
| Si | 0.68677400  | -3.64221200 | 2.04605300  |
| Si | -1.32059000 | 0.07622400  | -1.44297500 |
| Si | 3.44100400  | 1.06374000  | 1.58188100  |
| Si | 0.83310300  | 0.77699200  | 3.36578100  |
| Si | 2.10651900  | 4.62724400  | -1.75875800 |
| Si | -0.57122900 | 4.88022100  | -0.00633400 |
| Si | -0.96507400 | -0.94405100 | 1.45111400  |
| Si | -2.44873400 | 3.03111500  | -1.82734800 |
| Si | -0.57192000 | 3.64780000  | 2.97889000  |
| Si | 2.04775700  | -3.59216100 | -2.95482500 |
| O  | 4.60955800  | -0.08859600 | 1.36453400  |
| O  | 2.14816500  | 0.32444100  | -2.21386800 |
| O  | 2.88062800  | 1.56202600  | 0.10186200  |
| O  | 4.35837100  | -2.57453300 | 0.16251800  |
| O  | -0.22015400 | -2.41078200 | 1.35998500  |
| O  | -2.81160600 | -0.67455100 | -1.34697400 |
| O  | -0.65786000 | -0.04112900 | 0.08612300  |
| O  | -0.45396900 | -0.11301900 | 2.77917500  |
| O  | -1.55638300 | 4.30819400  | -1.21624000 |
| O  | -1.48878500 | 1.65028700  | -1.89244000 |
| O  | 2.37726600  | 3.00821900  | -2.10200500 |
| O  | 1.01276300  | 4.83902500  | -0.50299600 |
| O  | -2.61311200 | -1.21574400 | 1.47927800  |
| O  | 2.19195300  | 0.40812500  | 2.47667500  |
| O  | 2.23217400  | -3.67287200 | 1.40774400  |
| O  | -0.34259600 | -0.68064400 | -2.52793000 |
| O  | -0.78952900 | 3.93258200  | 1.34351100  |
| O  | 0.52102000  | 2.40256200  | 3.24370400  |
| O  | 1.78638500  | -2.03033000 | -3.49211100 |
| O  | 2.30807500  | -3.64438300 | -1.29831500 |
| H  | 3.89360600  | -5.07634200 | 0.08527700  |
| H  | 1.05182800  | 0.14305200  | -4.52905000 |
| H  | 1.03247400  | 0.40787500  | 4.75216700  |
| H  | -0.93850700 | 6.25449500  | 0.28698800  |
| H  | 6.58217700  | -1.45654500 | 0.60411100  |
| H  | 5.31960700  | -2.25285300 | 2.52415000  |
| H  | 4.02094900  | 2.19227700  | 2.28417600  |
| H  | 3.35547200  | 5.24785100  | -1.32205300 |
| H  | 4.40113100  | 1.44632100  | -1.95372400 |
| H  | 1.57278400  | 5.22812300  | -2.97818800 |
| H  | -2.82508600 | 3.38963200  | -3.18888800 |
| H  | 0.82259200  | -3.40791400 | 3.48146800  |
| H  | -1.86836900 | 3.27016800  | 3.53625000  |
| H  | -0.00801100 | 4.83858900  | 3.61207400  |
| H  | 0.86005900  | -4.39667000 | -3.22849700 |

|    |             |             |             |
|----|-------------|-------------|-------------|
| H  | 3.23309200  | -4.09024500 | -3.65019800 |
| H  | 0.00650400  | -4.89896700 | 1.74128200  |
| H  | -3.60321700 | 2.77927700  | -0.96480200 |
| Ta | -3.94077500 | -1.34425800 | 0.07573600  |
| H  | -4.01827100 | -3.96389900 | -0.47133000 |
| N  | -4.61644700 | -3.17586200 | -0.24903800 |
| N  | -5.38608700 | -0.36023500 | 0.38757400  |
| H  | -6.07007100 | 0.35224500  | 0.59284400  |
| H  | -5.58496900 | -3.46536100 | -0.23048300 |

## 1'

|    |             |             |             |
|----|-------------|-------------|-------------|
| Si | -5.41662700 | 0.33706500  | -1.33268400 |
| Si | -2.04104700 | 2.44006800  | 1.61516800  |
| Si | -0.79690200 | 0.06715600  | 3.37590800  |
| Si | -4.39450400 | -2.33647600 | 0.09389800  |
| Si | -1.95168200 | -3.37100900 | -1.67357400 |
| Si | 1.59429500  | -0.50596400 | 1.45720600  |
| Si | -2.63496200 | 1.97294900  | -1.47247700 |
| Si | -0.38769300 | 0.76727300  | -3.39424000 |
| Si | -0.09558800 | 4.99806900  | 1.60772200  |
| Si | 2.44263700  | 4.18572500  | -0.20445600 |
| Si | 0.60497200  | -1.43146100 | -1.39665300 |
| Si | 3.75209600  | 1.86534900  | 1.56263300  |
| Si | 1.99410500  | 2.92913100  | -3.15011300 |
| Si | -3.04959900 | -2.24690200 | 3.07976900  |
| O  | -4.22012200 | 1.49525900  | -1.49794400 |
| O  | -1.06007700 | 1.49708600  | 2.57429800  |
| O  | -2.03897200 | 1.81450400  | 0.07329200  |
| O  | -4.99777200 | -0.81281300 | -0.17741400 |
| O  | -0.72830100 | -2.34414200 | -1.14123300 |
| O  | 2.68550800  | -1.81244800 | 1.42393900  |
| O  | 0.93282300  | -0.47368300 | -0.07541200 |
| O  | 0.49144800  | -0.50851800 | -2.74761300 |
| O  | 3.24188500  | 3.35261200  | 0.99382200  |
| O  | 2.41263000  | 0.86757300  | 1.79705200  |
| O  | -1.42269700 | 3.97863900  | 1.58588700  |
| O  | 0.94214300  | 4.64541900  | 0.33298500  |
| O  | 1.93466300  | -2.49196300 | -1.51047800 |
| O  | -1.75612700 | 0.97068100  | -2.47662300 |
| O  | -3.43792900 | -2.76618300 | -1.20240900 |
| O  | 0.42544700  | -0.76269500 | 2.57864200  |
| O  | 2.30498200  | 3.18354200  | -1.52448800 |
| O  | 0.52244000  | 2.15083300  | -3.36047700 |
| O  | -2.17621600 | -0.84534100 | 3.36473100  |
| O  | -3.46847200 | -2.37630100 | 1.46670400  |
| H  | -5.49502900 | -3.27668100 | 0.21763900  |
| H  | -0.38625700 | 0.33765900  | 4.73751700  |
| H  | -0.74263700 | 0.42395000  | -4.75440000 |
| H  | 3.21652300  | 5.36596800  | -0.54661000 |
| H  | -6.61194100 | 1.01800800  | -0.84981600 |
| H  | -5.62374200 | -0.32359200 | -2.62144800 |
| H  | -2.57037200 | 3.34782600  | -1.92937200 |
| H  | -0.60357000 | 6.35047500  | 1.41054700  |
| H  | -3.38806000 | 2.50086500  | 2.14883300  |
| H  | 0.62484500  | 4.84088700  | 2.87165000  |
| H  | 4.37022400  | 2.08950200  | 2.86214300  |
| H  | -1.94310400 | -3.41056700 | -3.13283900 |
| H  | 3.06162200  | 2.08437100  | -3.67849700 |
| H  | 1.89074900  | 4.21431900  | -3.83784700 |
| H  | -2.22392400 | -3.40354800 | 3.41625200  |
| H  | -4.26157800 | -2.15746600 | 3.89035600  |
| H  | -1.72593600 | -4.67811600 | -1.06384600 |
| H  | 4.65083200  | 1.23707800  | 0.59538400  |

|    |            |             |             |
|----|------------|-------------|-------------|
| Ta | 3.10519800 | -2.89312200 | -0.07630800 |
| H  | 4.39546800 | -4.06943100 | -0.14155100 |
| H  | 4.65206300 | -2.26980600 | -0.60420800 |
| H  | 2.66306500 | -4.51395200 | 0.40901300  |

## 12

|    |             |             |             |
|----|-------------|-------------|-------------|
| Si | 4.85775000  | -2.57439300 | 1.57088400  |
| Si | 3.34104200  | 1.07945500  | -1.37023800 |
| Si | 1.17429400  | -0.17978100 | -3.36428200 |
| Si | 2.68465600  | -4.23758100 | -0.08651500 |
| Si | -0.07492100 | -3.85757500 | 1.46287900  |
| Si | -1.28075400 | 0.54676900  | -1.59080500 |
| Si | 3.32567600  | 0.26483500  | 1.70152300  |
| Si | 0.62937400  | 0.36513600  | 3.40600600  |
| Si | 3.08270200  | 4.28131200  | -1.24435300 |
| Si | 0.34784300  | 4.88856000  | 0.35275400  |
| Si | -1.20534000 | -0.85975100 | 1.18740700  |
| Si | -1.85257300 | 3.70487200  | -1.63883500 |
| Si | -0.20669100 | 3.47315300  | 3.20994200  |
| Si | 1.83050100  | -3.34772000 | -3.12581200 |
| O  | 4.42306500  | -0.97287900 | 1.78606800  |
| O  | 2.09153500  | 0.85957900  | -2.44904800 |
| O  | 2.87843700  | 0.48859100  | 0.11391500  |
| O  | 3.98252800  | -3.28428800 | 0.32100100  |
| O  | -0.52798600 | -2.33088200 | 0.92676700  |
| O  | -2.88836200 | -0.00699000 | -1.66518300 |
| O  | -0.79656900 | 0.19429300  | -0.03898300 |
| O  | -0.73631100 | -0.21371600 | 2.62570200  |
| O  | -0.66472400 | 4.65790900  | -0.94828700 |
| O  | -1.25096800 | 2.15202600  | -1.89876400 |
| O  | 3.64500900  | 2.70538500  | -1.24514600 |
| O  | 1.90215800  | 4.48901100  | -0.06553600 |
| O  | -2.87895800 | -1.04723400 | 1.12341700  |
| O  | 1.97134400  | -0.15778400 | 2.57870000  |
| O  | 1.54139200  | -4.12333200 | 1.12079000  |
| O  | -0.35975100 | -0.25438600 | -2.68696800 |
| O  | -0.18660900 | 3.92458500  | 1.59728900  |
| O  | 0.60448000  | 2.02301700  | 3.43607000  |
| O  | 1.85376900  | -1.68771200 | -3.35517600 |
| O  | 2.00204500  | -3.73661700 | -1.51012400 |
| H  | 3.12121700  | -5.61750400 | -0.21384100 |
| H  | 1.07919500  | 0.31710700  | -4.72071300 |
| H  | 0.63756900  | -0.16391000 | 4.75311900  |
| H  | 0.29584100  | 6.28723700  | 0.74049800  |
| H  | 6.26155100  | -2.59291600 | 1.17694700  |
| H  | 4.61128400  | -3.30668800 | 2.81325600  |
| H  | 3.94616800  | 1.45539300  | 2.25019300  |
| H  | 4.21596600  | 5.13023100  | -0.89599700 |
| H  | 4.54922300  | 0.42590400  | -1.83526800 |
| H  | 2.51620500  | 4.60212200  | -2.55489500 |
| H  | -2.16395600 | 4.27993300  | -2.94005900 |
| H  | -0.22463000 | -3.92582100 | 2.91396100  |
| H  | -1.60329500 | 3.30837600  | 3.60430800  |
| H  | 0.49482000  | 4.47667000  | 4.00775100  |
| H  | 0.54413500  | -3.87444900 | -3.57434900 |
| H  | 2.95982500  | -3.88957200 | -3.87747200 |
| H  | -0.89921000 | -4.83773100 | 0.76073600  |
| H  | -3.01233200 | 3.62260200  | -0.75144600 |
| Ta | -4.05023200 | -0.75701300 | -0.38753100 |
| H  | -5.72914600 | -0.91736500 | -0.93371100 |
| H  | -5.07850400 | 0.54873000  | 0.17541700  |

|   |             |             |             |
|---|-------------|-------------|-------------|
| H | -4.44129200 | -2.38837200 | -0.90328800 |
| N | -5.53744700 | -1.70166300 | 1.31780400  |
| N | -6.23507900 | -2.12243800 | 2.05002700  |

## Ts12-2

|    |             |             |             |
|----|-------------|-------------|-------------|
| Si | 4.81896200  | -2.75204200 | 1.38566000  |
| Si | 3.30369300  | 0.93702500  | -1.54635900 |
| Si | 0.98554000  | -0.27706900 | -3.39736700 |
| Si | 2.46580600  | -4.33435900 | -0.09079500 |
| Si | -0.15959700 | -3.79434900 | 1.64461900  |
| Si | -1.34009200 | 0.57745500  | -1.50587100 |
| Si | 3.43035700  | 0.15955300  | 1.53474000  |
| Si | 0.84417400  | 0.41682800  | 3.38563900  |
| Si | 3.13113800  | 4.14440300  | -1.48849200 |
| Si | 0.54440100  | 4.89743900  | 0.28580000  |
| Si | -1.16877700 | -0.75342900 | 1.29571900  |
| Si | -1.83750400 | 3.73979400  | -1.49890500 |
| Si | 0.16603000  | 3.56425600  | 3.21141500  |
| Si | 1.49078200  | -3.46696800 | -3.09623800 |
| O  | 4.47211600  | -1.12715800 | 1.58341200  |
| O  | 1.99264400  | 0.73898400  | -2.55386100 |
| O  | 2.90937200  | 0.37888100  | -0.03055900 |
| O  | 3.83997300  | -3.45000400 | 0.20797100  |
| O  | -0.61855200 | -2.28217500 | 1.07458100  |
| O  | -2.96419200 | 0.07825900  | -1.47298500 |
| O  | -0.74810700 | 0.21466900  | 0.00630600  |
| O  | -0.59131100 | -0.09292600 | 2.68602000  |
| O  | -0.57252300 | 4.67341200  | -0.92762900 |
| O  | -1.28321000 | 2.18100000  | -1.82439600 |
| O  | 3.65698000  | 2.55589000  | -1.46366900 |
| O  | 2.04744800  | 4.42874000  | -0.23562800 |
| O  | -2.85353500 | -0.80108300 | 1.29522100  |
| O  | 2.10771400  | -0.18581400 | 2.49104000  |
| O  | 1.41485200  | -4.12620800 | 1.18502800  |
| O  | -0.52062300 | -0.25462600 | -2.65898600 |
| O  | 0.07196500  | 3.98593200  | 1.59353000  |
| O  | 0.91121600  | 2.07331800  | 3.39852200  |
| O  | 1.59037100  | -1.81695600 | -3.37083300 |
| O  | 1.72142700  | -3.82675000 | -1.48099800 |
| H  | 2.81441800  | -5.73985600 | -0.21092100 |
| H  | 0.85663500  | 0.18451500  | -4.76349200 |
| H  | 0.89871400  | -0.10210700 | 4.73567200  |
| H  | 0.57282900  | 6.30617900  | 0.63772600  |
| H  | 6.19445900  | -2.84693400 | 0.91118900  |
| H  | 4.61293600  | -3.44217400 | 2.65913000  |
| H  | 4.13354000  | 1.32845300  | 2.02741700  |
| H  | 4.30648000  | 4.97709800  | -1.26141600 |
| H  | 4.46600300  | 0.24335300  | -2.06711900 |
| H  | 2.47475100  | 4.42642100  | -2.76561200 |
| H  | -2.26772900 | 4.32625800  | -2.76082900 |
| H  | -0.18983500 | -3.79103800 | 3.10459000  |
| H  | -1.19787100 | 3.48721400  | 3.72770000  |
| H  | 0.99031000  | 4.53775100  | 3.92448100  |
| H  | 0.15732000  | -3.93407500 | -3.46695600 |
| H  | 2.55002800  | -4.08798600 | -3.88782900 |
| H  | -1.06556400 | -4.77865800 | 1.05894200  |
| H  | -2.90333900 | 3.66910400  | -0.50047800 |
| Ta | -4.10698800 | -0.57856000 | -0.13096600 |
| H  | -5.80070800 | -0.77673900 | -1.06288800 |
| H  | -5.14285100 | 0.79426100  | 0.14343800  |
| H  | -5.31108000 | -1.42238600 | -1.37242800 |
| N  | -5.20021800 | -2.60827100 | 0.73852700  |
| N  | -5.86553500 | -1.77835100 | 1.12713200  |

## S14. References:

1. (a) Couty, M.; Hall, M. B. *J. Comput. Chem.* **1996**, *17*, 1359-1370.(b) Ehlers, A. W.; Böhme, M.; Dapprich, S.; Gobbi, A.; Höllwarth, A.; Jonas, V.; Köhler, K. F.; Stegmann, R.; Veldkamp, A.; Frenking, G.*Chem. Phys. Lett.* **1993**, *208*, 111-114.(c) Höllwarth, A.; Böhme, M.; Dapprich, S.; Ehlers, A. W.; Gobbi, A.; Jonas, V.; Köhler, K. F.; Stegmann, R.; Veldkamp, A.; Frenking, G.*Chem. Phys. Lett.* **1993**, *208*, 237-240.
2. Check, C. E.; Faust, T. O.; Bailey, J. M.; Wright, B. j.; Gilbert, T. M.; Sunderlin, L. S. *J. Phys. Chem. A*, **2011**, *105*, 8111.
3. Gaussian 09, Revision C.01, M. J. Frisch, G. W. Trucks, H. B. Schlegel, G. E. Scuseria, M. A. Robb, J. R. Cheeseman, G. Scalmani, V. Barone, B. Mennucci, G. A. Petersson, H. Nakatsuji, M. Caricato, X. Li, H. P. Hratchian, A. F. Izmaylov, J. Bloino, G. Zheng, J. L. Sonnenberg, M. Hada, M. Ehara, K. Toyota, R. Fukuda, J. Hasegawa, M. Ishida, T. Nakajima, Y. Honda, O. Kitao, H. Nakai, T. Vreven, J. A. Montgomery, Jr., J. E. Peralta, F. Ogliaro, M. Bearpark, J. J. Heyd, E. Brothers, K. N. Kudin, V. N. Staroverov, R. Kobayashi, J. Normand, K. Raghavachari, A. Rendell, J. C. Burant, S. S. Iyengar, J. Tomasi, M. Cossi, N. Rega, J. M. Millam, M. Klene, J. E. Knox, J. B. Cross, V. Bakken, C. Adamo, J. Jaramillo, R. Gomperts, R. E. Stratmann, O. Yazyev, A. J. Austin, R. Cammi, C. Pomelli, J. W. Ochterski, R. L. Martin, K. Morokuma, V. G. Zakrzewski, G. A. Voth, P. Salvador, J. J. Dannenberg, S. Dapprich, A. D. Daniels, Ö. Farkas, J. B. Foresman, J. V. Ortiz, J. Cioslowski, and D. J. Fox, Gaussian, Inc., Wallingford CT, 2009.
4. Li, J.; Li, S. *Angew. Chem., Int. Ed.* **2008**, *47*, 8040–8043.
5. (a) Zhao, Y.; Huang, Y.; Zheng, X.; Zhou, M. *J. Phys. Chem. A* **2010**, *114*, 5779–5786. (b) Wang, B.; Zhai, H-J.; Xin Huang, X.; Wang, L-S. *J. Phys. Chem. A* **2008**, *112*, 10962–10967
6. Zhao, Y.; Schultz, N. E.; Truhlar, D. G. *J. Chem. Theory and Comput.*, **2006**, *2*, 364-382.
7. (a) Soignier, S.; Taoufik, M.; Le Roux, E.; Saggio, G.; Dablemont, C.; Baudouin, A.; Lefebvre, F.; Mallmann, A. de.; Thivolle-Cazat, J.; Basset, J.-M.; Sunley, G.; Maunders, B. M. *Organometallics* **2006**, *25*, 1569–1577. (b) Vidal, V.; Theolier, A.; J. Thivolle-Cazat, J.; Basset, J.-M.; Corker, J. *J. Am. Chem. Soc.* **1996**, *118*, 4595-4602.
8. Avenier, P.; Taoufik, M.; Lesage, A.; Solans-Monfort, X.; Baudouin, A.; Mallmann, A. de.; Veyre, L.; Basset, J.-M.; Eisenstein, O.; Emsley, L.; Quadrelli, E. A. *Science* **2007**, *317*, 1056 – 1060.
9. Solans-Monfort, X.; Chow, C.; Goufe, E.; Kaya, Y.; Basset, J.-M.; Taoufik, M.; Quadrelli, E. A.; Eisenstein, O. *Inorg. Chem.* **2012**, *51*, 7237-7249.
10. Scudder, P. H. *Electron Flow in Organic Chemistry: A Decision-Based Guide to Organic Mechanisms*, 2nd ed.; John Wiley & Sons: Hoboken, New Jersey, 2013, chapter 2, pp 47-53.
11. Avenier, P.; Lesage, A.; Taoufik, M.; Baudouin, A.; Mallmann, A. de.; Fiddy, S.; Vautier, M.; Veyre, L.; Basset, J.-M.; Emsley, L.; Quadrelli, E. A. *J. Am. Chem. Soc.* **2007**, *129*, 176-186.
12. Cossi, M.; Rega, N.; Scalmani, G.; Barone, V. *J. Comp. Chem.*, **2003**, *24*, 669-681.
13. C. W. Hamilton, R. T. Baker, A. Staubitz, I. Manners, *Chem. Soc. Rev.*, **2009**, *38*, 279–293.
